# Supplementary material for: Importance of Cu and Ag regium–π bonds in supramolecular chemistry and biology: a combined crystallographic and ab initio study
Source: Royal Society of Chemistry journal article supplement (doi:10.1039/d2cp03874a), 2022-01-01
Supplement: d2cp03874a1.pdf [file d2cp03874a1.pdf]

## Importance of Cu and Ag Regium– $\pi$ bonds in supramolecular chemistry and biology: A combined crystallographic and *ab initio* study.

María de las Nieves Piña<sup>a</sup>, Tiddo J. Mooibroek<sup>b</sup>, Antonio Frontera<sup>a</sup> and Antonio Bauzá<sup>a,\*</sup>

<sup>a</sup>Department of Chemistry, Universitat de les Illes Balears  
Ctra. de Valldemossa km 7.5, 07122 Palma de Mallorca (Spain)  
E-mail: antonio.bauza@uib.es

<sup>b</sup>Van't Hoff Institute for Molecular Sciences, University of Amsterdam, Science Park A,  
904, E1.26, 1098 XH Amsterdam, The Netherlands.

### Description of additional biological Rg– $\pi$ complexes

Structure 2X50 corresponds to a protein-inhibitor complex between *Leishmania* Trypanothione Reductase (TR) and silver. Leishmaniasis is suffered by around 12 million people worldwide and owing to the absence of effective vaccines against this disease, the group of Baiocco and collaborators<sup>1</sup> evaluated the inhibitory effect of Ag nanoparticles on the TR Activity. Specifically, they determined and analyzed the X-ray structure of a complex between Ag and TR to understand the molecular basis of protein inhibition. Interestingly, in a parallel way to the commonly used Sb(III) drugs, an Ag ion coordinates to the two known catalytic cysteine residues (CYS52 and CYS57) while also establishing a Rg– $\pi$  bond with the  $\pi$ -system of HIS461 ( $d_{\text{Ag}\cdots\text{C}} = 2.893\text{\AA}$ ), a fact that passed unnoticed to the original authors, which described the Ag $\cdots$ HIS461 interaction as a mere coordination bond. The computed interaction energy strength resulted in  $-11.4$  kcal/mol, which is a moderately strong value. This example highlights the role of Rg– $\pi$  interactions in the inhibition mechanism of TR and their use in the field of rational drug design.

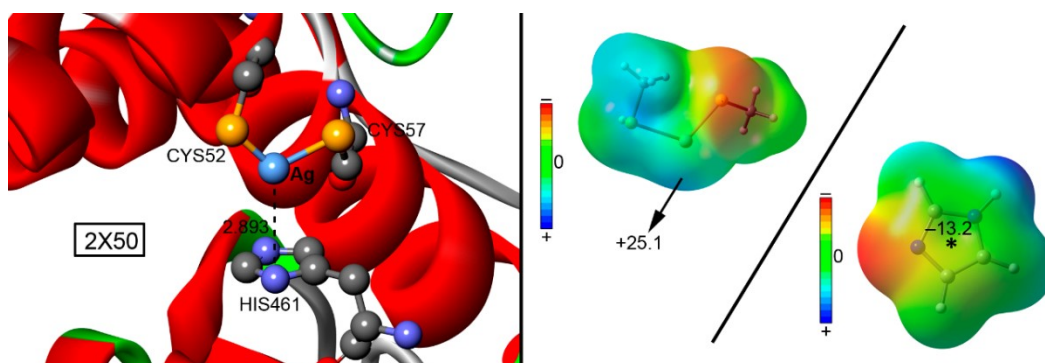

**Figure S1.** (Left) Partial view of the X-ray structure 2X50 exhibiting a Rg– $\pi$  bond. Distance in  $\text{\AA}$ . (Right) MEP surfaces of both Rg– $\pi$  donor and acceptor moieties. Energies at selected points in the surface are given in kcal/mol (0.001 a.u.).

<sup>1</sup> P. Baiocco, A. Ilari, P. Ceci, P. Orsini, M. Gramiccia, T. Di Muccio and G. Colotti, Inhibitory Effect of Silver Nanoparticles on Trypanothione Reductase Activity and *Leishmania infantum* Proliferation. *ACS. Med. Chem. Lett.* 2011, **2**, 230–233.

Structure 2VB3 encompasses the work from Xue and coworkers,<sup>2</sup> where they analysed a novel metal recognition site present in CusF protein. The Cus operon encodes a bacterial copper homeostasis system with several methionine-motif proteins, including the periplasmic protein CusF, which is thought to serve as copper chaperone or regulator. CusF binds metal ions *in vitro*, and a methionine-rich metal site has been proposed based on an apo-CusF structure and NMR chemical shift data. With the purpose to provide more structural insights into this metal-binding protein, the authors solved the crystal structures of Cu(I)-CusF and Ag(I)-CusF. Both metal-bound forms of CusF are defined by a small barrel with two orthogonally packed  $\beta$ -sheets. In both Cu(I)-CusF and Ag(I)-CusF structures, the metal ion is coordinated to HIS36, MET47 and MET49 residues in a trigonal planar fashion. Interestingly, the aromatic system of TRP44 is in contact with the metal ion (see Figure S2 for the Ag(I)-CusF complex) and undergoes a Rg- $\pi$  bond with the S-Ag-S coordination complex. The computed Rg- $\pi$  interaction energy resulted in  $-15.5$  kcal/mol, hence remarking the potential of Rg- $\pi$  bonds to be involved in metal-specific gene regulatory and cation-trafficking protein families.

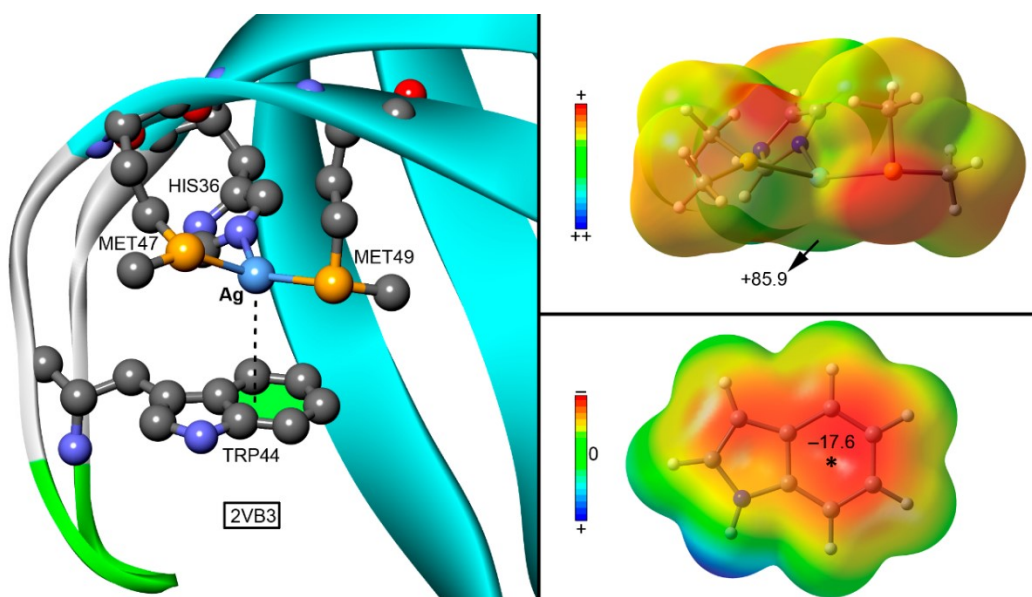

**Figure S2.** (Left) Partial view of the X-ray structure 2VB3 exhibiting a Rg- $\pi$  bond. Distance in Å. (Right) MEP surfaces of both Rg- $\pi$  donor and acceptor moieties. Energies at selected points in the surface are given in kcal/mol (0.001 a.u.).

<sup>2</sup> Y. Xue, A. V. Davis, G. Balakrishnan, J. P. Stasser, B. M. Staehlin, P. Focia, T. G. Spiro, J. E. Penner-Hahn and T. V. O'Halloran, Cu(I) recognition via cation- $\pi$  and methionine interactions in CusF. *Nature Chem. Biol.* 2008, **4**, 107–109.

## List of PDB structures

Cu(I)-212 hits:

3K0I, 3KSS, 3NT0, 3OMI, 3OMN, 3OMA, 3OM3, 3OW7, 3CVB, 3CVD, 3DSO, 4MAI, 4N3T, 4OUA, 4OZ7, 4DP8, 4DP1, 4DP4, 4DP6, 4DPA, 4DPC, 4F2E, 4F2F, 4L05, 2XMW, 2XMT, 2XMU, 2XMV, 3QJT, 3QJU, 3QJV, 3QJQ, 3QJR, 3QJS, 3QQX, 3HB3, 3I9Z, 3I04, 3I01, 3HW7, 2ZWD, 3FT0, 3FSA, 3FYE, 3FYI, 3ZDW, 3N7D, 4BZ4, 3T0U, 3T5W, 2Z8Y, 2ZKW, 2ZKX, 2ZMZ, 2ZOW, 4BDV, 4TM7, 4RKM, 2YOX, 2YOY, 2XY5, 3EH3, 3EH4, 3EH5, 3EIM, 3F7L, 3F7K, 5AA7, 6TWE, 2QDW, 2QIF, 2QPE, 2QPD, 2RNB, 2RSQ, 2RAC, 2RLI, 1F56, 1FD8, 1FEE, 2PPF, 2PPE, 2PPD, 2PPC, 2PP9, 2PP8, 2PP7, 2PPA, 5ARN, 5C92, 6CPD, 6EK9, 6L9S, 6M98, 6FF2, 5YJS, 5NQM, 5NQO, 5NQN, 5MSZ, 5I0W, 4BTE, 5WEH, 5VDF, 5VDE, 5FEJ, 5FJE, 5K BK, 5KBM, 5KBL, 2XV0, 2XV2, 2XV3, 4M1P, 6Q58, 6Q6B, 6R01, 4P5S, 1K0V, 1DZ0, 6QVH, 6QYB, 6S07, 1HAW, 1A3Z, 1A8Z, 1AQS, 1AQR, 1B3I, 1N18, 6RW7, 1BA9, 1BXA, 6MF0, 6MF2, 6N5U, 2N0M, 2KM0, 2LEL, 2IDS, 2IDU, 2JCW, 2K4W, 2K70, 2K6Z, 2GQM, 2GT6, 2HH7, 2HRN, 2HRF, 2HX9, 2HX8, 2HXA, 1PU0, 1PTZ, 1R1C, 1TL4, 1U96, 6XTO, 6XTQ, 6XTP, 6XTS, 6XTR, 1RJU, 2BZC, 2CAL, 2CAK, 2CCW, 2FJS, 2FK2, 2FT7, 2FT8, 2GA7, 2GBA, 2GBT, 2GBV, 2GGP, 2GIO, 1OF0, 1Q05, 1KQK, 1L3N, 1JXG, 1JZG, 1KVJ, 1MJG, 1N19, 1ZPU, 2B08, 2AQT, 2AQS, 2AQR, 2AQQ, 2AQP, 2AQN, 2B3I, 2AHL, 1WS7, 1X9L, 1S6U, 1SF3, 1SFH, 1SNR, 1UUX, 1UUY, 1YSO, 2BHF, 1YJV, 1YJT, 1YLB, 2E86, 2EIC

Ag(I)-53 hits:

3KSO, 3NSD, 3OPO, 2X17, 2X50, 3UGE, 3H94, 2VB3, 3RU5, 5A4G, 5AFA, 2QCP, 2RVP, 6JR4, 6KA0, 5Z3W, 5AY2, 6LBW, 6LDI, 6M2P, 6IO4, 6IO6, 6G48, 5XUV, 5KU5, 5NXL, 5F0W, 5F0U, 4X89, 4WLV, 5IX7, 6NIZ, 5XJZ, 5FFE, 5FFD, 1A00, 1AQQ, 2MZC, 2KE8, 2M54, 6XTM, 6XTL, 6XTN, 7C17, 7BSF, 7BSG, 7BSE, 7BSH, 7CGC, 7CGD, 2G7N, 1Q06, 2AW0

## List of CSD structures

**Table S1.** List of CSD codes obtained from the CSD search including the CSD code, the size of the aromatic ring and the Rg atom involved.

| Cu(I) – 6 member ring |
|-----------------------|
| CUPORY                |
| ENCCBP10              |
| GALTUI                |
| GOLSOR                |
| NEKDAK                |

| TECCIN                |        |
|-----------------------|--------|
| UQAROU                |        |
| WATWET                |        |
| Ag(I) – 6 member ring |        |
| ABOREQ                | LUXPUR |
| ACUQUK                | LUZHUU |
| ACUREV                | MADYUM |
| ACURUL                | MAFDIH |
| ADUJOB                | MARGIW |
| AHIDIE                | MARGOC |
| AHIDOK                | MARHET |
| AHIDUQ                | MASKID |
| AJAZAM                | MASMEB |
| AJAZEQ                | MASQED |
| AJEKAD                | MAYCAR |
| AJORAS                | MAYCEV |
| AKIYOI                | MEHYEF |
| AKUJOH                | MEKGEP |
| APAGOP                | MEKGIT |
| ATOMAX                | MEKGOZ |
| AWEGOZ                | MEKGUF |
| AWEHUG                | MEVDAV |
| AWENEW                | MICVOM |
| AWENIA                | MOFCAN |
| AWENOG                | MOFDEQ |
| AWUPIR                | MOFDUG |
| AXAWIF                | MOFLIC |
| AXEGIV                | MOFLUO |
| AXENAS                | MOKQIO |
| AYOGUQ                | MOQFOP |
| AYOHAX                | MOTNAL |
| BADGET                | MOZVAZ |
| BAFDIW                | MUKVAR |
| BAFTIO                | MUTMOD |
| BAFTOU                | MUZJUN |
| BAMLUZ                | MUZYOV |
| BAQGIM                | NABYUL |
| BEHPIO                | NAGLOY |
| BEHPOU                | NAGLUE |
| BEKBOL                | NAGMAL |
| BEKDUR                | NANZEI |
| BEKDUR01              | NAPAGP |
| BIMWAY                | NATNEB |
| BOCFEH                | NEBHOT |
| BOYGIG                | NEGDEJ |

|          |          |
|----------|----------|
| BULSEI   | NEGQOI   |
| BUNFOG   | NEKDAK   |
| BUTGAZ   | NEKYUY   |
| BUTGAZ01 | NEKYUY01 |
| CABMAU   | NEKZAF   |
| CABMUO   | NEKZEJ   |
| CAGLOC   | NEPHEV   |
| CALJEF   | NEWNOU   |
| CASQAO   | NEXRAK   |
| CEJCOM   | NEYJUX   |
| CEJCUS   | NEYLOT   |
| CENHOU   | NEYMUA   |
| CENHUA   | NEYPOX   |
| CETNIY   | NEYPUD   |
| CEXKIA   | NEYQEO   |
| CEYXOV   | NIBMOB   |
| CICVES   | NIBMOB01 |
| CIKGEJ   | NIBMOB02 |
| CIWWUB   | NIBMUH   |
| COCDIJ   | NIBNAO   |
| COJKAQ   | NISFUQ   |
| COJKEU   | NOJNUY01 |
| CUCSOI   | NOMBID   |
| CUPORY   | NOPHOS   |
| CUTNEL   | NOPJAG   |
| CUWNIS   | NORDAZ   |
| CUWPAM   | NOWGOX   |
| CUWPEQ   | NOXYAC   |
| DABFUJ   | NUNSEW   |
| DACKAV   | NUSGOX   |
| DATJAL   | NUSGUD   |
| DATJOZ   | NUVBOW   |
| DATKOA   | OBECUT   |
| DAXTAY   | OBEKOW   |
| DAXTEC   | OBIWIH   |
| DECNEF   | ODACAX   |
| DEDROW   | ODACAX   |
| DEHDIE   | OGAQEU   |
| DEHPAI   | OGOLEB   |
| DEKRIV   | OHACUW   |
| DEKYUQ   | OJAROI   |
| DEKZIF   | OJEDAJ   |
| DEMKAK   | OKABOS   |
| DEMKEO   | OKAGIR   |
| DEYKOJ   | OKOQAI   |
| DEYKOJ01 | OKUGOQ   |

|          |          |
|----------|----------|
| DIBSIT   | OKUXID   |
| DIFMUC   | OQAGIX   |
| DIGLAI   | OQINUY02 |
| DIGLEM   | OROPUH   |
| DIHVOF   | OSASEH   |
| DILCUX   | OSOQEU   |
| DOHDAG   | OTUNUN   |
| DOHXOP   | OTUPAV   |
| DOHXOP   | OTUPEZ   |
| DONHEV   | OVACOE   |
| DOQZER   | OXUQAB   |
| DOZYEY   | OYIHEL   |
| DUJZAK   | OZASIT   |
| DUJZAK01 | PAIPAG   |
| DUPMIL   | PAJGAL   |
| DURSIT   | PALSED   |
| ECETAK   | PAWMEG   |
| ECETEO   | PAWYOE   |
| ECOCIJ   | PAXQIO   |
| EGADOF   | PAXQIO01 |
| EGOHAK   | PAXQOU01 |
| EJAZOF   | PEFPOH   |
| EJEPAM   | PEJSOM   |
| EJICOR   | PEMROQ   |
| EJIMUG   | PEWQIR   |
| EJIROF   | PEWYUL   |
| EKOTAZ   | PEXGOP   |
| EKOVAB   | PEYVOG   |
| EKOYIN   | PICTOM   |
| EMIPUN   | PIHVAG   |
| ENCCBP10 | PITCIF   |
| ENEZAZ   | PIVLUE   |
| EPADAC   | PIVQIV   |
| EPADEG   | PIYJUD   |
| EQEHUE   | PIZCIN   |
| EQEQEX   | PIZKUF   |
| ERIKEW   | PIZKUF   |
| EROBUK   | POCPOM   |
| ESASEW   | POKBAT   |
| ESASIA   | POKBEX   |
| ESETOL   | POKBIB   |
| ETIGEU   | PORZOM   |
| EWASOK   | PORZUS   |
| EYAQAW   | POSHOW   |
| EYAYIO   | POTYEE   |
| EZASEE   | PUCYES   |

|          |          |
|----------|----------|
| EZUKIT   | PUHNEM   |
| EZUKIT01 | PUHNEM01 |
| EZUKOZ   | PUQDIQ   |
| EZUKOZ01 | PURXOR   |
| FASRUO   | PURYAD   |
| FAZYIQ   | PURZIM   |
| FAZZEN   | PURZOS   |
| FEFFII   | PUXNUR   |
| FELFAE   | QAHYOP   |
| FELFOS   | QAJWUT   |
| FELGAF   | QAJZOT   |
| FENXAY   | QANZIR   |
| FIBSAK   | QANZOX   |
| FIGRUJ   | QARNOP   |
| FILTEA   | QASBIW   |
| FIRROQ   | QAVCUN   |
| FIRRUW   | QEBVAW   |
| FIWJAZ   | QIPXUK   |
| FIZBOG   | QIPYIZ   |
| FIZCIB   | QIPYOF   |
| FIZCOH   | QIXHAH   |
| FOKGAP   | QODHUO   |
| FUDFIU   | QODHUO03 |
| FUFVOT   | QODHUO05 |
| FUFVUZ   | QODHUO06 |
| FUFWAG   | QODHUO07 |
| FUFWEK   | QODHUO09 |
| FUFWIO   | QODHUO10 |
| FUFWOU   | QODHUO11 |
| FUGPAZ   | QODHUO12 |
| FUJLOM   | QODHUO13 |
| FULYUI   | QOFCAR   |
| FURRUG   | QOFCEV   |
| FURRUG01 | QOFCIZ   |
| FUXCIM   | QOFCOD   |
| GAKNEM   | QOFCOF   |
| GALFEF   | QOFCUJ   |
| GALTUI   | QOFDAS   |
| GAPDEI   | QOFDEW   |
| GAQWUT   | QOFDIA   |
| GARNUJ   | QOFDIA02 |
| GAWYUA   | QOFDIA03 |
| GEFDEB   | QOFDIA04 |
| GEFJIL   | QOFDIA05 |
| GEGBEB   | QOFDIA06 |
| GGBOL    | QOFDIA07 |

|          |          |
|----------|----------|
| GEGYAU   | QOFDOG   |
| GEKYUS   | QOJDOJ   |
| GEMDUY   | QOLTES   |
| GIQMIF   | QOXBUA   |
| GIQMOL   | QQQBUV01 |
| GIYVAM   | QUXJEZ   |
| GIYVOA   | RAKGEQ   |
| GIYZOG   | RAKGIU   |
| GOBGOT   | RANYEL   |
| GOBNER   | RANYIP   |
| GOBQEU01 | RANYOV   |
| GOLNIF   | RAYZAT   |
| GOLSOR   | RAYZEX   |
| GONWAH   | RECJIS   |
| GOQMAC   | REHHUI   |
| GUBRIF   | REJHAQ   |
| GUBYEI   | RENNII   |
| GUCYIO   | RERQEM   |
| GUCYOU   | REXSAO   |
| GUCYUA   | RICZAH   |
| GUCZIP   | RIDHAQ   |
| GUFYAJ   | RIMPAH   |
| GUGCES   | RIMVUH   |
| GUPZAU   | RIPTIU   |
| GUPZAU01 | RISVOF   |
| GUXTOJ   | RITHAF   |
| HAKKEL   | RIVTOG   |
| HAPFOV   | RIYNEU   |
| HAWDUG   | ROBNAZ   |
| HAWZAI   | ROBNIH   |
| HAYXUC   | ROFGAW   |
| HEBDEZ   | ROGLAA   |
| HEDRIS   | ROJSEQ   |
| HEFFII   | ROLNUC   |
| HEQTOO   | ROMQQA   |
| HESVEG   | RORJAJ   |
| HETQEC   | RUKZUT   |
| HILJAO   | RULBAC   |
| HILJIW   | RULBEG   |
| HILJUI   | RULFOU   |
| HIMXEI   | SACQOF   |
| HIWHEB   | SACQUL   |
| HOQFEY   | SADWOL   |
| HORWAN   | SADWUR   |
| HORWER   | SAJKEU   |
| HUGYOZ   | SARNAB   |



|          |        |
|----------|--------|
| HUHBER   | SARNEF |
| HUMFUQ   | SARNOP |
| HUTTEV   | SARPEH |
| ICEFEB   | SARPIL |
| ICUBOA   | SEGFIV |
| IHUPIK   | SEGFUH |
| IJISIE   | SEHBIS |
| IJISOK   | SEHBOY |
| IJISUQ   | SEHCAL |
| IJUNAE   | SEHCEP |
| IKEWAX   | SEHCIT |
| ILIBUB   | SEHCOZ |
| IQOVEQ   | SEMNUU |
| IQOVIU   | SEWSEU |
| IQOVOA   | SEWVUN |
| IRIPEF   | SIJJAZ |
| IXIVOA   | SIXGOV |
| IZACER   | SIXPIZ |
| IZIJUY   | SIYZUV |
| JABBOE   | SOBQEI |
| JABRUA   | SOBQOS |
| JACVIS   | SOMQAM |
| JADVEQ   | SOMQIU |
| JAQUG    | SOWWIL |
| JAPXEG   | SOYFAP |
| JAQPEX   | SOYFET |
| JAQPOH   | SOYFUJ |
| JAQPOH01 | SUFTUK |
| JEFDEG   | SUFVAS |
| JEHWID   | SUHJEL |
| JEHWUP   | SUHVEX |
| JEHxEA   | SUXZER |
| JIQYUE   | TABPES |
| JOBXAZ   | TACYIH |
| JOFPAY   | TAGBOT |
| JOJNAY   | TAGCAG |
| JOJNEC01 | TALQOP |
| JUJSUE   | TECSOK |
| KAJGAF   | TEHMAX |
| KAJGEJ   | TEHMID |
| KAJGEJ   | TEJBOB |
| KAJGOT   | TEJYEM |
| KAJGUZ   | TEPWES |
| KAPFOY   | TEQQEM |
| KAPFUE   | TEWPIW |
| KAXTOU   | TEZGEM |

|        |        |
|--------|--------|
| KAYSEK | TIBCAI |
| KEQWUY | TIFZOY |
| KETRAD | TIJFOH |
| KEWBAS | TIJNIK |
| KICVEY | TINDIE |
| KICVUO | TINTEQ |
| KICWEZ | TIRMOZ |
| KICWUP | TITKIS |
| KIDNES | TITKOY |
| KIDNIW | TITKUE |
| KIDNOC | TITLAL |
| KIDYIG | TIZCOW |
| KIDYOM | TOHJUX |
| KIDYUS | TOHXAR |
| KIDZED | TOKKEL |
| KIDZIH | TOLCIH |
| KIJNUO | TOLCON |
| KILQAX | TOLCUT |
| KIMZOY | TONJAI |
| KIRLUV | TUDNIR |
| KOHTOR | TUDVOE |
| KOHWEK | TUHVUO |
| KOLWOY | TUSKEZ |
| KUGKUT | TUXRAF |
| KUGLAA | TUZCUM |
| KUGLEE | UBEWAB |
| KUQPOC | UBOGIB |
| KUXXEH | UBONEE |
| KUYNOI | UCAKAM |
| KUZPIG | UDEREB |
| LAFNIQ | UDERIF |
| LAGCAZ | UFAGEO |
| LALMOB | UFOPEK |
| LALMUH | UGADAI |
| LALZUW | UHEZAJ |
| LALZUW | UHEZEN |
| LAMCIN | UHEZIR |
| LARMAV | ULACUF |
| LAYJAY | ULADAM |
| LEDXAU | ULADIU |
| LEDXEY | ULAGIX |
| LEDYEZ | UMIFUT |
| LEDYID | UMODEG |
| LEFKOZ | UNOSAT |
| LELZOR | UPUVEH |
| LESMUU | UQEVAO |

|          |          |
|----------|----------|
| LIKGES   | UTAVUH   |
| LINPII   | VANLUR   |
| LINQIJ   | VANLUR01 |
| LIVKEI   | VANMEC   |
| LOKGUO   | VATBIB   |
| LOLTUC   | VATBUN   |
| LONQUC   | VAXTOE   |
| LOPRUF   | VAXTUK   |
| LOZQOG   | VAXVAS   |
| LUDROR   | VEFHIY   |
| LUDSEI   | VEFHOE   |
| LULNIR   | VEGMIF   |
| LULNOX   | VELJOO   |
| LUMNOX   | VIGDEW   |
| LURDIM   | VIGDOG   |
| VIKBIB   | XADYUZ   |
| VILNEK   | XADZAG   |
| VINZAV01 | XADZEK   |
| VINZID   | XANXEP   |
| VIPTOF   | XANXOZ   |
| VIYDUE   | XAYNIU   |
| VODCUN   | XEBGIU   |
| VOPDEL   | XECZUB01 |
| VUDKAI   | XEDBEO   |
| VUFROF   | XEKFIE   |
| VUMBOV   | XELYAP   |
| VUQQUV   | XENTER   |
| VUSQUW   | XIGKAA   |
| VUVGUQ   | XIHCEX   |
| WAFWAD   | XIWKOE   |
| WAVBUR   | XIWKUK   |
| WAVCAY   | XIWLAR   |
| WAVCEC   | XIWRIG   |
| WAWLAK   | XIWSED   |
| WAWLEO   | XIXREE   |
| WAWLIS   | XOBDIC   |
| WEBHIX   | XOBDUI   |
| WEBMIC   | XOHVOG   |
| WEGBUI   | XOKGAH   |
| WEGVEM   | XOLTAT   |
| WESZIE   | XOPJUI   |
| WEZSIG   | XOPREB   |
| WIHWER   | XOPREB   |
| WIJQAI   | XORNID   |
| WITLAO   | XOVBAN   |
| WIVVOO   | XUFLAM   |

|        |        |
|--------|--------|
| WIWXAD | XUFLEQ |
| WOHHUX | XUKWAC |
| WOHJAF | XUSDOF |
| WOHJIN | XUVZAP |
| WOHJOT | YALKIH |
| WOHJUZ | YASMAH |
| WONKEQ | YASMEL |
| WONQEW | YECTOQ |
| WUFMIT | YEGNAA |
| WULBAI | YETPOD |
| WUWYAO | YETRAR |
| WUZBOI | YETTAT |
| XABLAP | YETTEX |
| XADYEJ | YEWGAL |
| XADYIN | YIBVUC |
| XADYOT | YIJLAF |
| YIJLAF | YINTUM |
| YINVAU |        |
| YINVEY |        |
| YINYAX |        |
| YINYEB |        |
| YIQLES |        |
| YIQLOB |        |
| YIQLUH |        |
| YIRYIK |        |
| YISKOB |        |
| YIYHET |        |
| YOGTUM |        |
| YOGVOI |        |
| YOTWIP |        |
| YOYGEZ |        |
| YOZCIB |        |
| YOZSIQ |        |
| YUJKAQ |        |
| YUNKUO |        |
| ZEDFOG |        |
| ZEPDAC |        |
| ZEPWUO |        |
| ZEYMAR |        |
| ZIBPAB |        |
| ZIYXOU |        |
| ZIZXAJ |        |

|        |
|--------|
| ZOLKUJ |
| ZOTNIH |
| ZUJPUR |
| ZUJQAY |
| ZUJQEC |
| ZULTOR |
| ZUWVEU |
| ZUWVEU |
| YEGNAA |
| YETPOD |
| YETRAR |
| YETTAT |
| YETTEX |
| YEWGAL |
| YIBVUC |

|                              |
|------------------------------|
| <b>Ag(I) – 5 member ring</b> |
|------------------------------|

|        |
|--------|
| BARJAI |
| CAGCAQ |
| DOKJOD |
| DUKMOM |
| ECENIK |
| ECEPEI |
| EPUSUE |
| EQUXOE |
| EROTEK |
| INEKET |
| KAWMIH |
| OMEVUY |
| RUQMOH |
| TITKIS |
| TITKOY |

## Cartesian coordinates of the PDB models

### 2XY5

|    |            |            |            |
|----|------------|------------|------------|
| C  | 1.3303402  | 2.1446262  | -5.6037130 |
| C  | 1.8273398  | 1.5286266  | -4.4637137 |
| C  | 0.1213408  | 2.8186259  | -5.5667131 |
| C  | -0.6056588 | 2.8786258  | -4.4017138 |
| C  | -0.1166590 | 2.2666262  | -3.2717144 |
| C  | -1.0146586 | 2.4136261  | -2.0847150 |
| C  | 1.1013402  | 1.5836266  | -3.2807144 |
| O  | 1.6023400  | 0.9926269  | -2.2277150 |
| N  | -1.2256584 | -2.8973709 | 2.8802822  |
| C  | -2.3046578 | -2.1173714 | 3.1662820  |
| N  | -2.8366575 | -1.5293717 | 2.1172826  |
| C  | -2.0266580 | -1.9423714 | 1.0742832  |
| C  | -2.0466580 | -1.6703716 | -0.3007160 |
| N  | -2.9476574 | -0.8913720 | -0.9027157 |
| N  | -1.1006585 | -2.2533713 | -1.0537156 |
| C  | -0.1986590 | -3.0483708 | -0.4637160 |
| N  | -0.0826590 | -3.3833706 | 0.8102834  |
| C  | -1.0336586 | -2.7813710 | 1.5292830  |
| C  | 3.7133388  | -2.2503713 | 2.6312823  |
| C  | 3.3863390  | -1.7113716 | 1.3882830  |
| C  | 2.9933392  | -1.9053715 | 3.7652817  |
| C  | 1.9533398  | -1.0043720 | 3.6642818  |
| C  | 1.6263400  | -0.4673723 | 2.4402824  |
| C  | 0.4833406  | 0.4936272  | 2.4982824  |
| C  | 2.3393396  | -0.8013721 | 1.2862830  |
| O  | 2.0713398  | -0.2823724 | 0.1162837  |
| Cu | 0.7103405  | 0.7866270  | -0.4357160 |
| N  | -0.8636586 | 2.0046264  | -0.5417159 |
| C  | -1.8546580 | 2.5096260  | 0.4152836  |
| C  | -1.4316583 | 2.0166263  | 1.7762828  |
| N  | -0.2056590 | 1.2366268  | 1.5952829  |
| H  | 2.7743795  | 0.9884967  | -4.4530408 |
| H  | -0.2581709 | 3.3057571  | -6.4680891 |
| H  | -1.5606485 | 3.4085255  | -4.3761381 |
| H  | -2.6809483 | -2.0173346 | 4.1854955  |
| H  | 0.5486665  | -3.4750637 | -1.1430961 |
| H  | 3.9308966  | -1.9676062 | 0.4789883  |
| H  | 3.2584250  | -2.3327610 | 4.7351292  |
| H  | 1.3878678  | -0.7153906 | 4.5544740  |
| H  | 0.1066012  | 0.5652292  | 3.5378673  |
| H  | -1.8939545 | 3.6111483  | 0.3809368  |

|   |            |            |            |
|---|------------|------------|------------|
| H | -2.8639945 | 2.1387895  | 0.1624672  |
| H | -1.2475945 | 2.8530917  | 2.4720335  |
| H | -2.2036430 | 1.3693058  | 2.2273156  |
| H | -0.6252685 | -3.4053552 | 3.5162948  |
| H | 4.5418857  | -2.9600612 | 2.7068522  |
| H | 1.8993423  | 2.0962291  | -6.5361291 |
| H | -2.8632315 | -0.7358225 | -1.8967544 |
| H | -3.6882391 | -0.4614892 | -0.3708220 |
| H | -1.9264041 | 2.9976267  | -2.2701506 |

### 3OW7

|    |            |            |            |
|----|------------|------------|------------|
| C  | 4.4396030  | 0.2728490  | 2.6881947  |
| S  | 2.6466030  | 0.2348490  | 2.6451947  |
| C  | 2.2376030  | 1.4198490  | 3.9041947  |
| C  | -0.6843970 | 2.2468490  | -4.8468053 |
| C  | -1.0453970 | 1.0228490  | -4.0208053 |
| O  | -1.4423970 | -0.0181510 | -4.5508053 |
| N  | -0.9223970 | 1.1728490  | -2.7028053 |
| C  | -1.2553970 | 0.1258490  | -1.7488053 |
| C  | -2.4283970 | 0.7008490  | -0.9808053 |
| O  | -3.5673970 | 0.5748490  | -1.4068053 |
| C  | -0.0883970 | -0.1301510 | -0.8118053 |
| C  | -0.1343970 | -1.4671510 | -0.1398053 |
| C  | -0.7783970 | -1.6271510 | 1.0671947  |
| C  | 0.4656030  | -2.5651510 | -0.7148053 |
| C  | -0.8183970 | -2.8581510 | 1.6871947  |
| C  | 0.4326030  | -3.7941510 | -0.0968053 |
| C  | -0.2133970 | -3.9411510 | 1.1021947  |
| N  | -2.1503970 | 1.3518490  | 0.1421947  |
| C  | -3.1963970 | 1.9908490  | 0.9391947  |
| Cu | 3.4296030  | -2.2471510 | 1.5501947  |
| H  | 4.8525734  | -0.1881131 | 3.5975198  |
| H  | 4.8198069  | -0.2742696 | 1.8002523  |
| H  | 2.6964803  | 2.3807188  | 3.6267887  |
| H  | 2.5687820  | 1.1101880  | 4.9058899  |
| H  | 1.1448705  | 1.5323570  | 3.9059497  |
| H  | -0.3949491 | 3.1250440  | -4.2515886 |
| H  | 0.0918990  | 0.6714594  | -0.0861553 |
| H  | 0.8160685  | -0.1149645 | -1.4445764 |
| H  | 0.9507893  | -2.4617102 | -1.6910887 |
| H  | -1.2780474 | -0.7709387 | 1.5272984  |
| H  | 0.8855616  | -4.6604627 | -0.5876302 |
| H  | -1.3475677 | -2.9718478 | 2.6366235  |
| H  | -0.2633091 | -4.9221020 | 1.5821497  |

|   |            |            |            |
|---|------------|------------|------------|
| H | -1.5771168 | -0.7547002 | -2.3182778 |
| H | -4.1589836 | 1.5785077  | 0.6121619  |
| H | -3.2159360 | 3.0818253  | 0.7873582  |
| H | -1.5497501 | 2.5023387  | -5.4738344 |
| H | -3.0455357 | 1.7780879  | 2.0076318  |
| H | 0.1384918  | 1.9812021  | -5.5257086 |
| H | 4.8237712  | 1.3013411  | 2.5990104  |
| H | -0.6831857 | 2.0837112  | -2.3336536 |
| H | -1.2000745 | 1.5276042  | 0.4197604  |

#### 4RKM

|    |            |            |            |
|----|------------|------------|------------|
| C  | 3.3487566  | -2.8019505 | -3.3622483 |
| S  | 2.8417566  | -1.2269505 | -2.6482483 |
| C  | 5.1927566  | -3.8159505 | 0.1967517  |
| S  | 3.6807566  | -3.2939505 | 1.0457517  |
| Cu | 2.7197566  | -1.9769505 | -0.4902483 |
| S  | 1.5207566  | 0.9630495  | 0.0457517  |
| O  | 1.8347566  | 1.7950495  | -1.1772483 |
| O  | 2.2447566  | 1.7450495  | 1.1237517  |
| C  | 0.0737566  | -2.7689505 | 0.4527517  |
| C  | -0.5362434 | 0.9070495  | 3.5937517  |
| C  | -1.3802434 | 3.9350495  | -0.1042483 |
| C  | -1.6352434 | 0.0510495  | -3.0682483 |
| C  | 0.0407566  | -2.0119505 | 1.5817517  |
| C  | 0.2227566  | -2.5239505 | 2.8737517  |
| C  | 0.0497566  | -1.4889505 | 3.7377517  |
| C  | -0.2662434 | -0.3329505 | 2.9997517  |
| C  | 0.1607566  | -1.5289505 | 5.2367517  |
| C  | 0.5907566  | -3.9499505 | 3.1927517  |
| C  | -0.8142434 | 2.1220495  | 2.9347517  |
| C  | -0.9592434 | 3.4140495  | 3.5157517  |
| C  | -1.1982434 | 4.2870495  | 2.4697517  |
| C  | -1.1712434 | 3.4970495  | 1.2237517  |
| C  | -0.8852434 | 3.7310495  | 4.9887517  |
| C  | -1.4042434 | 5.7410495  | 2.4567517  |
| C  | -1.5172434 | 3.1200495  | -1.2582483 |
| C  | -1.8272434 | 3.5880495  | -2.5522483 |
| C  | -1.9072434 | 2.4820495  | -3.4042483 |
| C  | -1.6632434 | 1.3350495  | -2.6112483 |
| C  | -2.0322434 | 5.0360495  | -2.9212483 |
| C  | -2.1642434 | 2.4070495  | -4.8622483 |
| C  | -1.1792434 | -1.0019505 | -2.2932483 |
| C  | -1.0122434 | -2.3289505 | -2.8882483 |
| C  | -0.5252434 | -3.1259505 | -1.9112483 |



|    |            |            |            |
|----|------------|------------|------------|
| C  | -0.3902434 | -2.2519505 | -0.7412483 |
| C  | -1.3522434 | -2.6879505 | -4.3152483 |
| C  | -0.1542434 | -4.6029505 | -1.9132483 |
| N  | -0.3032434 | -0.6989505 | 1.6747517  |
| N  | -0.9342434 | 2.2810495  | 1.6407517  |
| N  | -1.4252434 | 1.7470495  | -1.3452483 |
| N  | -0.7822434 | -0.9929505 | -1.0142483 |
| Fe | -0.8362434 | 0.4790495  | 0.1807517  |
| H  | 4.2685501  | -3.2144471 | -2.9147776 |
| H  | 2.5601907  | -3.5713512 | -3.3058391 |
| H  | 5.8637310  | -4.3261265 | 0.8999370  |
| H  | 4.8725659  | -4.5218102 | -0.5807292 |
| H  | 0.3395382  | -3.8215327 | 0.5150142  |
| H  | -0.4633880 | 0.9507015  | 4.6807370  |
| H  | -1.5202776 | 5.0067859  | -0.2513239 |
| H  | -1.8779608 | -0.1437342 | -4.1108223 |
| H  | 0.9373407  | -0.8369897 | 5.6003817  |
| H  | -0.7855264 | -1.2369597 | 5.7200490  |
| H  | 0.4184891  | -2.5332155 | 5.5981188  |
| H  | 0.6786341  | -4.1110115 | 4.2750575  |
| H  | 1.5519956  | -4.2335370 | 2.7342971  |
| H  | 0.0973077  | 3.4559769  | 5.4055807  |
| H  | -1.6496896 | 3.1768585  | 5.5575282  |
| H  | -1.0400018 | 4.8022653  | 5.1772533  |
| H  | -2.3880663 | 6.0080259  | 2.0353476  |
| H  | -0.6449581 | 6.2481535  | 1.8383735  |
| H  | -1.1220083 | 5.6295463  | -2.7384115 |
| H  | -2.8444118 | 5.4884430  | -2.3295439 |
| H  | -2.2929266 | 5.1447067  | -3.9826998 |
| H  | -3.0285339 | 1.7618630  | -5.0906676 |
| H  | -1.2955729 | 1.9891973  | -5.3970497 |
| H  | -1.2026042 | -3.7609035 | -4.4951509 |
| H  | -2.3992334 | -2.4468319 | -4.5558894 |
| H  | -0.7086158 | -2.1360517 | -5.0185779 |
| H  | -0.7565918 | -5.1671709 | -1.1845706 |
| H  | 0.9079296  | -4.7362447 | -1.6509555 |
| H  | -1.3523987 | 6.1848952  | 3.4619978  |
| H  | -2.3712134 | 3.3948945  | -5.2974780 |
| H  | 3.5611035  | -2.6403565 | -4.4319879 |
| H  | 5.6884454  | -2.9620237 | -0.2821248 |
| H  | -0.3128877 | -5.0483187 | -2.9045549 |
| H  | -0.1685358 | -4.6538420 | 2.8148810  |
| H  | 4.2227439  | -2.3854573 | 1.8907160  |

## 2QCP

|    |            |            |            |
|----|------------|------------|------------|
| C  | 3.7652796  | -0.2136012 | -3.9388492 |
| N  | 3.2982796  | 0.7953988  | -3.1158492 |
| C  | 3.1532796  | -1.3516012 | -3.5088492 |
| C  | 2.4202796  | 0.2653988  | -2.2548492 |
| N  | 2.3012796  | -1.0416012 | -2.4718492 |
| C  | -3.9287204 | 5.1333988  | 1.5551508  |
| C  | -2.8357204 | 4.1103988  | 1.9111508  |
| O  | -2.7087204 | 3.6923988  | 3.0671508  |
| N  | -1.9797204 | 3.7503988  | 0.9291508  |
| C  | -0.8597204 | 2.8923988  | 1.2341508  |
| C  | 0.4272796  | 3.6803988  | 1.2331508  |
| O  | 0.6912796  | 4.5353988  | 0.3711508  |
| C  | -0.7097204 | 1.7633988  | 0.1941508  |
| C  | -1.7297204 | 0.7173988  | 0.2571508  |
| C  | -2.6827204 | 0.5123988  | 1.2201508  |
| C  | -1.9017204 | -0.3246012 | -0.6838492 |
| N  | -3.4237204 | -0.5946012 | 0.9211508  |
| C  | -2.9817204 | -1.1126012 | -0.2618492 |
| C  | -1.2607204 | -0.6316012 | -1.8958492 |
| C  | -3.4327204 | -2.1976012 | -0.9918492 |
| C  | -1.6957204 | -1.6976012 | -2.5988492 |
| C  | -2.8127204 | -2.4516012 | -2.1798492 |
| N  | 1.2752796  | 3.4323988  | 2.2391508  |
| C  | 2.6182796  | 3.9973988  | 2.2361508  |
| C  | 1.1082796  | 2.4433988  | 3.3541508  |
| C  | 3.2512796  | -2.5616012 | 1.2131508  |
| S  | 1.4432796  | -2.7036012 | 1.0241508  |
| C  | 1.1212796  | -1.0826012 | 1.6301508  |
| C  | 1.0232796  | -5.8316012 | -2.3828492 |
| S  | -0.2287204 | -4.5376012 | -2.1048492 |
| C  | -0.9967204 | -5.1426012 | -0.5998492 |
| Ag | 0.8972796  | -2.3556012 | -1.3398492 |
| H  | 3.2502972  | -2.3645477 | -3.8921415 |
| H  | 1.8816065  | 0.8445494  | -1.5062215 |
| H  | -3.5926667 | 6.1233336  | 1.8983698  |
| H  | 0.2947045  | 1.3186814  | 0.3348049  |
| H  | -0.6774159 | 2.2293387  | -0.8070410 |
| H  | -2.9065087 | 1.1117109  | 2.1043649  |
| H  | -0.4695700 | 0.0161895  | -2.2833109 |
| H  | -1.2439880 | -1.9387763 | -3.5646054 |
| H  | -4.2906192 | -2.7885697 | -0.6611306 |
| H  | -3.1516736 | -3.2789548 | -2.8070395 |
| H  | -1.0694416 | 2.4757402  | 2.2223057  |

|   |            |            |            |
|---|------------|------------|------------|
| H | 0.0664353  | 2.3933176  | 3.6937707  |
| H | 1.4562775  | 1.4401906  | 3.0569382  |
| H | 2.7201472  | 4.6643291  | 1.3721998  |
| H | 0.5230243  | -6.7996924 | -2.5268514 |
| H | 1.5625825  | -5.5663616 | -3.3022233 |
| H | -0.2845081 | -5.1686636 | 0.2376706  |
| H | -1.8099624 | -4.4426503 | -0.3623588 |
| H | -1.4209373 | -6.1422689 | -0.7718000 |
| H | 3.4812925  | -2.3995156 | 2.2753932  |
| H | 3.7176889  | -3.4995727 | 0.8828989  |
| H | 1.7023225  | -0.3328610 | 1.0737698  |
| H | 1.3770094  | -1.0150131 | 2.6988576  |
| H | 0.0507409  | -0.8525295 | 1.5154746  |
| H | -4.1455977 | 5.1793799  | 0.4789152  |
| H | -4.8353978 | 4.8723618  | 2.1145552  |
| H | 1.7147644  | 2.7891474  | 4.2006540  |
| H | 2.7940374  | 4.5754092  | 3.1566546  |
| H | 3.3743666  | 3.1958237  | 2.1758466  |
| H | 3.6301254  | -1.7302338 | 0.6022493  |
| H | 4.4918048  | -0.0294104 | -4.7258198 |
| H | 1.7303730  | -5.8924927 | -1.5433281 |
| H | 3.5564071  | 1.7739605  | -3.1736019 |
| H | -4.2225591 | -0.9194451 | 1.4471581  |
| H | -1.9469579 | 4.2704834  | 0.0602557  |

### 2VB3

|   |            |            |            |
|---|------------|------------|------------|
| C | 0.7523193  | 4.0579550  | -3.5597337 |
| N | 1.5213178  | 3.2159564  | -2.7907351 |
| C | -0.5296787 | 3.6609557  | -3.3857341 |
| C | 0.7423194  | 2.3409578  | -2.1847361 |
| N | -0.5106787 | 2.5969575  | -2.5187355 |
| C | 3.7783141  | -1.8360352 | 4.9672519  |
| C | 3.0943153  | -2.1920346 | 3.6512540  |
| O | 2.7003159  | -3.3440326 | 3.4322544  |
| N | 2.9543154  | -1.1880362 | 2.7882555  |
| C | 2.4353164  | -1.3780358 | 1.4322577  |
| C | 3.5703146  | -1.3540358 | 0.4272594  |
| O | 4.4133130  | -0.4500375 | 0.4592593  |
| C | 1.4443182  | -0.2860376 | 1.0472585  |
| C | 0.1483201  | -0.3600376 | 1.7362573  |
| C | -0.3756788 | -1.4330358 | 2.3712562  |
| C | -0.8236781 | 0.6819606  | 1.8372571  |
| N | -1.6056769 | -1.1250364 | 2.8892553  |
| C | -1.9096763 | 0.1669615  | 2.5662558  |

|    |            |            |            |
|----|------------|------------|------------|
| C  | -0.8796781 | 2.0039584  | 1.3912579  |
| C  | -3.0386745 | 0.9249602  | 2.8582553  |
| C  | -2.0006762 | 2.7499572  | 1.6802574  |
| C  | -3.0656744 | 2.2099582  | 2.4082561  |
| N  | 3.5843146  | -2.3340342 | -0.4887390 |
| C  | 4.5253129  | -2.3310343 | -1.5937372 |
| C  | 2.6833159  | -3.5010322 | -0.5477389 |
| C  | -0.3026789 | -0.7120370 | -3.2347343 |
| S  | -1.6966767 | -1.0320364 | -2.1127363 |
| C  | -1.3906771 | -2.7630334 | -1.7647369 |
| C  | -5.2886705 | 1.3029596  | -2.5037355 |
| S  | -4.6986716 | 1.4469594  | -0.8027384 |
| C  | -5.2736707 | 3.0809566  | -0.4137391 |
| Ag | -2.0326762 | 1.3409595  | -1.2977377 |
| H  | 4.8647135  | -1.9808639 | 4.8587256  |
| H  | 1.9302990  | 0.6926588  | 1.2049871  |
| H  | 1.2868282  | -0.3558959 | -0.0488520 |
| H  | 0.0741764  | -2.4068926 | 2.5672475  |
| H  | -0.0314857 | 2.4573144  | 0.8697212  |
| H  | -2.0467892 | 3.7954134  | 1.3644414  |
| H  | -3.8649255 | 0.5067647  | 3.4376177  |
| H  | -3.9221267 | 2.8445486  | 2.6495387  |
| H  | 1.9399298  | -2.3531233 | 1.4477761  |
| H  | 2.4849676  | -3.9083084 | 0.4535562  |
| H  | 1.7264969  | -3.2595224 | -1.0420879 |
| H  | 5.1505795  | -1.4321581 | -1.5249559 |
| H  | 2.5318596  | 3.2626549  | -2.7172718 |
| H  | -1.4495775 | 4.0575673  | -3.8067206 |
| H  | 1.0932868  | 1.5643017  | -1.5077762 |
| H  | 0.6552271  | -0.7503283 | -2.6946798 |
| H  | -0.4428692 | 0.2834544  | -3.6720122 |
| H  | -2.1543786 | -3.1017661 | -1.0519175 |
| H  | -1.4825810 | -3.3404131 | -2.6952997 |
| H  | -0.3977583 | -2.9100800 | -1.3164857 |
| H  | -6.3881865 | 1.3120466  | -2.5236625 |
| H  | -4.9315687 | 0.3389901  | -2.8919420 |
| H  | -6.3730537 | 3.1047864  | -0.4383000 |
| H  | -4.9391673 | 3.3135707  | 0.6049032  |
| H  | -4.8706480 | 3.8361324  | -1.1037908 |
| H  | 3.4191669  | -2.5275688 | 5.7382544  |
| H  | 3.5937897  | -0.7967569 | 5.2744781  |
| H  | 3.1780930  | -4.2884613 | -1.1290331 |
| H  | 5.1775972  | -3.2176322 | -1.5525498 |
| H  | 3.9896736  | -2.3338836 | -2.5576338 |

|   |            |            |            |
|---|------------|------------|------------|
| H | -0.3006630 | -1.4599557 | -4.0411775 |
| H | 1.1953738  | 4.8527133  | -4.1546255 |
| H | -4.8972500 | 2.1152160  | -3.1328096 |
| H | -2.1796405 | -1.7462969 | 3.4408890  |
| H | 3.4616682  | -0.3244949 | 2.9453088  |

## 2x50

|    |            |            |            |
|----|------------|------------|------------|
| C  | -3.4470404 | -5.2340085 | 1.9072932  |
| S  | -2.9060404 | -4.3170085 | 3.3692932  |
| C  | 0.4909596  | -3.8220085 | -0.4927067 |
| S  | -1.2890404 | -3.7500085 | -0.1827067 |
| C  | -0.6890404 | 5.1559915  | -2.8447067 |
| C  | 0.1099596  | 4.2689915  | -1.8917068 |
| O  | 1.1939596  | 4.6599915  | -1.4537067 |
| N  | -0.4220404 | 3.0879915  | -1.5727068 |
| C  | -0.0240404 | 2.3669915  | -0.3467068 |
| C  | 1.4679596  | 2.0629915  | -0.0927067 |
| O  | 2.0419596  | 2.6039915  | 0.8582932  |
| C  | -0.8600404 | 1.1039915  | -0.1117067 |
| C  | -0.3830404 | 0.2969915  | 1.0542933  |
| N  | -0.6160404 | 0.6679915  | 2.3602933  |
| C  | 0.3599596  | -0.8330085 | 1.1102932  |
| C  | -0.0620404 | -0.2140085 | 3.1722933  |
| N  | 0.5339596  | -1.1370085 | 2.4382933  |
| N  | 2.0919596  | 1.1739915  | -0.8927067 |
| C  | 3.4699596  | 0.8369915  | -0.5327068 |
| C  | 1.6549596  | 0.4179915  | -2.0757068 |
| Ag | -1.1900404 | -3.1820085 | 2.0792932  |
| H  | -1.4755302 | 4.6265396  | -3.4029799 |
| H  | -1.9195743 | 1.3860364  | 0.0243233  |
| H  | -0.8349929 | 0.4445365  | -0.9912551 |
| H  | 0.7511471  | -1.4485876 | 0.3086445  |
| H  | -0.0974908 | -0.1731201 | 4.2593608  |
| H  | -0.2147327 | 3.0538691  | 0.4969225  |
| H  | 0.7261457  | 0.8336073  | -2.4861896 |
| H  | 2.4285714  | 0.4979926  | -2.8542911 |
| H  | 3.7099225  | 1.2994462  | 0.4296510  |
| H  | -4.0713572 | -6.0862327 | 2.2103810  |
| H  | -4.0598394 | -4.5290569 | 1.3292310  |
| H  | 1.1135283  | -3.7167821 | 0.4079745  |
| H  | 0.8095202  | -3.0434710 | -1.2096645 |
| H  | -2.5983099 | -5.5277866 | 1.2734527  |
| H  | 1.5060610  | -0.6483113 | -1.8344276 |
| H  | 3.5786986  | -0.2576034 | -0.4578727 |

|   |            |            |            |
|---|------------|------------|------------|
| H | 4.1705066  | 1.2088457  | -1.2994482 |
| H | 0.0123689  | 5.6253046  | -3.5457085 |
| H | -1.1547746 | 5.9582478  | -2.2523705 |
| H | -1.3434744 | 2.8640783  | -1.9281507 |
| H | -1.1004538 | 1.5141215  | 2.6332573  |
| H | 0.7563860  | -4.7890979 | -0.9503806 |
| H | -2.2183004 | -5.3075507 | 3.9809924  |

### 3H94

|    |            |            |            |
|----|------------|------------|------------|
| C  | -4.6225555 | -0.0086008 | 3.0470927  |
| S  | -2.9485578 | 0.4993984  | 2.6560932  |
| C  | -2.0765592 | -0.6616001 | 3.6530917  |
| C  | 0.7144370  | -2.5555973 | -4.7038966 |
| C  | 0.7914368  | -1.2675991 | -3.9818976 |
| O  | 0.6534371  | -0.2226006 | -4.6018967 |
| N  | 0.9684367  | -1.3365991 | -2.6748993 |
| C  | 1.1264363  | -0.1596006 | -1.8659005 |
| C  | 2.3174348  | -0.4996001 | -1.0359017 |
| O  | 3.3944333  | 0.0253990  | -1.2009013 |
| C  | -0.0585619 | 0.0283990  | -0.9719018 |
| C  | 0.0224379  | 1.2653974  | -0.2169028 |
| C  | 0.8754368  | 1.3503972  | 0.8830957  |
| C  | -0.5915612 | 2.4143957  | -0.6509022 |
| C  | 1.0514365  | 2.5553954  | 1.6140947  |
| C  | -0.4425613 | 3.6093939  | 0.0360968  |
| C  | 0.3684375  | 3.6753939  | 1.1700952  |
| N  | 2.1134350  | -1.4255988 | -0.1389028 |
| C  | 3.1954335  | -2.0115981 | 0.6410959  |
| Ag | -2.8455580 | 2.5123955  | 2.9370927  |
| H  | -0.1243294 | -3.1705225 | -4.3388586 |
| H  | -0.2209154 | -0.8402208 | -0.3164955 |
| H  | -0.9532445 | 0.0511643  | -1.6173475 |
| H  | 1.4134161  | 0.4602010  | 1.2147180  |
| H  | -1.2124174 | 2.3857474  | -1.5517187 |
| H  | 1.7292478  | 2.5943926  | 2.4689402  |
| H  | -0.9310028 | 4.5145085  | -0.3343808 |
| H  | 0.5033050  | 4.6358809  | 1.6771538  |
| H  | 1.3285702  | 0.7023919  | -2.5109603 |
| H  | 4.1411858  | -1.6352106 | 0.2319298  |
| H  | -4.8362337 | 0.1007637  | 4.1189597  |
| H  | -5.3242549 | 0.5997144  | 2.4601346  |
| H  | -2.3292395 | -0.5731816 | 4.7186852  |
| H  | -2.3357307 | -1.6636675 | 3.2824405  |
| H  | -0.9988496 | -0.4977041 | 3.5127558  |

|   |            |            |            |
|---|------------|------------|------------|
| H | 1.6329823  | -3.1519352 | -4.5777554 |
| H | 0.5683792  | -2.3517141 | -5.7695495 |
| H | 3.1349164  | -1.7167253 | 1.7014023  |
| H | 3.1750601  | -3.1090244 | 0.5750866  |
| H | 1.1802381  | -2.2353976 | -2.2630132 |
| H | 1.2003053  | -1.8379972 | -0.0220068 |
| H | -4.7377084 | -1.0597268 | 2.7450594  |

### 3OPO

|    |            |            |            |
|----|------------|------------|------------|
| C  | -4.0372970 | 0.2595603  | -6.1999167 |
| C  | -4.2922963 | 0.1485605  | -4.6889203 |
| O  | -4.8262950 | -0.8574369 | -4.2319214 |
| N  | -3.8112976 | 1.1715580  | -3.9699221 |
| C  | -3.8492976 | 1.3215576  | -2.5089258 |
| C  | -4.1052968 | 2.8045539  | -2.2099266 |
| O  | -3.9172972 | 3.6415519  | -3.0919242 |
| C  | -2.5063008 | 0.9305586  | -1.8809275 |
| C  | -1.7153030 | -0.1494387 | -2.6109257 |
| S  | 0.0026929  | -0.2544384 | -2.0349269 |
| C  | 0.5886913  | -1.6584350 | -2.9779248 |
| N  | -4.5342958 | 3.1495530  | -0.9929296 |
| C  | -4.8112950 | 4.5565495  | -0.6969304 |
| C  | 2.0596877  | 2.0805557  | 6.0570526  |
| C  | 2.4556866  | 0.7425591  | 5.4480542  |
| O  | 3.1736848  | -0.0534389 | 6.0640526  |
| N  | 1.9846877  | 0.4925596  | 4.2330572  |
| C  | 2.3636868  | -0.7314371 | 3.5470589  |
| C  | 3.7946832  | -0.6234375 | 3.0280601  |
| O  | 4.6386812  | -1.4564353 | 3.3580596  |
| C  | 1.3906893  | -1.0824363 | 2.4260617  |
| C  | 1.8116881  | -2.2774333 | 1.6180636  |
| C  | 1.5006889  | -3.5614300 | 2.0310626  |
| C  | 2.5326863  | -2.1144336 | 0.4500668  |
| C  | 1.8866880  | -4.6544272 | 1.2880644  |
| C  | 2.9226853  | -3.2054309 | -0.2939314 |
| C  | 2.5986862  | -4.4784278 | 0.1280677  |
| N  | 4.0646825  | 0.4005600  | 2.2210623  |
| C  | 5.4376790  | 0.7205592  | 1.8080633  |
| Ag | -0.9283049 | -1.6014350 | -0.2209314 |
| H  | -3.6777174 | 1.2451019  | -6.5266980 |
| H  | -5.5464180 | 4.9620926  | -1.4073064 |
| H  | 1.3363148  | 2.6553828  | 5.4604014  |
| H  | 0.4004325  | -1.2545553 | 2.8846961  |
| H  | 1.2909841  | -0.2071371 | 1.7563554  |

|   |            |            |            |
|---|------------|------------|------------|
| H | 0.9536989  | -3.7077497 | 2.9676285  |
| H | 2.8251081  | -1.1061582 | 0.1402411  |
| H | 1.6405290  | -5.6608019 | 1.6347464  |
| H | 3.5191936  | -3.0651818 | -1.1996733 |
| H | 2.9194578  | -5.3452605 | -0.4547895 |
| H | 2.4131294  | -1.5384465 | 4.2930501  |
| H | 5.9843033  | 1.2558544  | 2.6011367  |
| H | -4.6565459 | 0.6721713  | -2.1310982 |
| H | -2.6718101 | 0.6515448  | -0.8226770 |
| H | -1.8669685 | 1.8309153  | -1.8510133 |
| H | -2.2108676 | -1.1335319 | -2.5842498 |
| H | -1.6686055 | 0.1334045  | -3.6747099 |
| H | -0.1761230 | -2.4422656 | -3.0604197 |
| H | 1.4714698  | -2.0595193 | -2.4612563 |
| H | 0.8787761  | -1.3259809 | -3.9852006 |
| H | -5.2032790 | 4.6350035  | 0.3240224  |
| H | -3.8923466 | 5.1530031  | -0.7835761 |
| H | -3.2944800 | -0.5055106 | -6.4697543 |
| H | -4.9671576 | 0.0101134  | -6.7280932 |
| H | 1.6460968  | 1.8962962  | 7.0577631  |
| H | 2.9713915  | 2.6806034  | 6.1917741  |
| H | 5.9640331  | -0.2212434 | 1.6087905  |
| H | 5.4112932  | 1.3354911  | 0.8988272  |
| H | 1.3470309  | 1.1429232  | 3.7940713  |
| H | 3.4036676  | 1.1678980  | 2.2130243  |
| H | -4.8262200 | 2.4379619  | -0.3362134 |
| H | -3.5870638 | 2.0501847  | -4.4356098 |

### **5FFE**

|   |            |            |            |
|---|------------|------------|------------|
| C | -4.8245433 | 1.1866051  | -1.1763808 |
| N | -4.7355435 | -0.1143925 | -0.7283815 |
| C | -4.0465446 | 1.9226039  | -0.3463821 |
| C | -3.9475448 | -0.1603925 | 0.3296167  |
| N | -3.5165455 | 1.0616055  | 0.5816163  |
| C | 4.4764411  | 1.5246047  | 0.2266169  |
| C | 3.5294426  | 0.7096060  | 1.1026153  |
| O | 3.4744426  | 0.9056057  | 2.3186133  |
| N | 2.7834438  | -0.1993925 | 0.4796163  |
| C | 1.6924456  | -0.8863913 | 1.1616152  |
| C | 2.1014450  | -2.2353889 | 1.7306143  |
| O | 1.5574460  | -2.6743883 | 2.7356126  |
| C | 0.5114477  | -1.0883909 | 0.2076169  |
| C | -0.0305514 | 0.1776069  | -0.3773821 |
| C | 0.2054483  | 1.4516048  | 0.0556170  |



|    |            |            |            |
|----|------------|------------|------------|
| C  | -0.8815499 | 0.2946068  | -1.5203803 |
| N  | -0.4605507 | 2.3496033  | -0.7383815 |
| C  | -1.1335496 | 1.6636045  | -1.7153800 |
| C  | -1.4595490 | -0.6293917 | -2.3973788 |
| C  | -1.9325481 | 2.1326037  | -2.7543782 |
| C  | -2.2565476 | -0.1643925 | -3.4183771 |
| C  | -2.4875473 | 1.2016051  | -3.5893767 |
| N  | 3.0484435  | -2.8993878 | 1.0786155  |
| C  | 3.3794429  | -4.2773855 | 1.4296149  |
| Ag | -2.0745479 | 0.9606057  | 2.1026137  |
| O  | 0.0344485  | 1.1746052  | 4.2156101  |
| H  | 5.3649496  | 1.7697884  | 0.8206042  |
| H  | -0.2647412 | -1.6459621 | 0.7590582  |
| H  | 0.8226935  | -1.7658894 | -0.6077861 |
| H  | 0.8574953  | 1.7996343  | 0.8574085  |
| H  | -1.2745065 | -1.7001833 | -2.2784363 |
| H  | -2.7032128 | -0.8728751 | -4.1201297 |
| H  | -2.1053962 | 3.2016418  | -2.8991357 |
| H  | -3.1129417 | 1.5348377  | -4.4215419 |
| H  | 1.4007404  | -0.2801391 | 2.0325137  |
| H  | 2.8633262  | -4.5118126 | 2.3678524  |
| H  | -5.1999078 | -0.9066627 | -1.1578588 |
| H  | -3.8378636 | 2.9880111  | -0.3432079 |
| H  | -3.7119895 | -1.0721307 | 0.8747316  |
| H  | 0.9172242  | 1.4534087  | 3.9312272  |
| H  | 0.2043083  | 0.3315733  | 4.6570299  |
| H  | 3.9841650  | 2.4703988  | -0.0493601 |
| H  | 4.7754622  | 1.0055623  | -0.6956502 |
| H  | 4.4634900  | -4.3926922 | 1.5738630  |
| H  | 3.0468229  | -4.9762380 | 0.6459836  |
| H  | 3.5332203  | -2.4477043 | 0.3147909  |
| H  | 2.7675188  | -0.1846201 | -0.5338320 |
| H  | -5.4175109 | 1.4570873  | -2.0452255 |
| H  | -0.3765274 | 3.3545854  | -0.6779952 |

### 5KU5

|   |           |            |            |
|---|-----------|------------|------------|
| C | 5.1451249 | 1.1688679  | 1.5067839  |
| C | 4.2041259 | 0.0478691  | 1.0437844  |
| O | 4.3931257 | -1.1101293 | 1.4207840  |
| N | 3.2071269 | 0.3948687  | 0.2277853  |
| C | 2.2841281 | -0.5981301 | -0.3432140 |
| C | 3.0101273 | -1.6371289 | -1.1962131 |
| O | 2.6971276 | -2.8251276 | -1.1262132 |
| C | 1.2051293 | 0.0688691  | -1.2122130 |

|    |            |            |            |
|----|------------|------------|------------|
| C  | 0.2331303  | 0.9608683  | -0.4642140 |
| C  | 0.0401305  | 0.8768683  | 0.9237846  |
| C  | -0.5488687 | 1.8618671  | -1.1822132 |
| C  | -0.8758683 | 1.7018675  | 1.5657838  |
| C  | -1.4648678 | 2.6818663  | -0.5442138 |
| C  | -1.6298675 | 2.6018663  | 0.8297847  |
| N  | 3.9651261  | -1.1831293 | -2.0052121 |
| C  | 4.7681253  | -2.0801285 | -2.8382112 |
| C  | -2.1448671 | -1.5931289 | -2.3612117 |
| N  | -1.7918674 | -1.3811293 | -1.0502132 |
| C  | -1.7288675 | -2.8451275 | -2.6612114 |
| C  | -1.2048681 | -2.4621280 | -0.5682138 |
| N  | -1.1568681 | -3.3671269 | -1.5262128 |
| C  | -5.6818631 | 1.9278671  | 3.6917815  |
| N  | -6.5668620 | 1.5388675  | 2.7097826  |
| C  | -4.4878643 | 1.3918677  | 3.3617818  |
| C  | -5.9288627 | 0.8088683  | 1.8157836  |
| N  | -4.6678642 | 0.7068685  | 2.1897832  |
| Ag | -3.3008657 | -0.3451304 | 0.6387848  |
| H  | 6.1138867  | 0.7111097  | 1.7369505  |
| H  | 0.6428802  | -0.7354355 | -1.7117733 |
| H  | 1.6931616  | 0.6415614  | -2.0182719 |
| H  | -0.4199285 | 1.9366935  | -2.2660962 |
| H  | 0.6426580  | 0.1857575  | 1.5176784  |
| H  | -2.0514291 | 3.3982955  | -1.1245405 |
| H  | -0.9819161 | 1.6500122  | 2.6527310  |
| H  | -2.3398756 | 3.2620317  | 1.3342926  |
| H  | 1.8359558  | -1.1934669 | 0.4662551  |
| H  | 4.1096876  | -2.8374877 | -3.2822057 |
| H  | -1.7701072 | -3.4198883 | -3.5838326 |
| H  | -0.6691440 | -4.2561902 | -1.4780937 |
| H  | -0.7941044 | -2.5904139 | 0.4313796  |
| H  | -7.5503803 | 1.7847766  | 2.6881337  |
| H  | -3.5275688 | 1.4504861  | 3.8667936  |
| H  | -6.3882229 | 0.3716821  | 0.9317890  |
| H  | 4.7519799  | 1.6206926  | 2.4307868  |
| H  | 5.2723562  | 1.9652556  | 0.7581932  |
| H  | 5.5359501  | -2.5999229 | -2.2434385 |
| H  | 5.2523280  | -1.4990977 | -3.6332923 |
| H  | -2.6445127 | -0.8440953 | -2.9689429 |
| H  | -5.9968044 | 2.5367097  | 4.5355075  |
| H  | 4.2900207  | -0.2343213 | -1.8662005 |
| H  | 3.0317092  | 1.3748910  | 0.0403340  |

## Cartesian coordinates of the CSD models

### AHIDUQ

|    |            |            |            |
|----|------------|------------|------------|
| N  | 0.3346306  | 0.8322808  | 1.3565874  |
| C  | 1.5306306  | 0.2082808  | 1.4565874  |
| H  | 2.3345818  | 0.5995530  | 0.8251785  |
| C  | 1.7376306  | -0.8637192 | 2.2935874  |
| H  | 2.7282170  | -1.3202498 | 2.3331866  |
| C  | 0.6876306  | -1.3417192 | 3.0465874  |
| H  | 0.8183104  | -2.2048093 | 3.7038060  |
| C  | -0.5543694 | -0.7087192 | 2.9625874  |
| C  | -0.6923694 | 0.3752808  | 2.1095874  |
| H  | -1.6621818 | 0.8625519  | 1.9872225  |
| C  | 4.8456306  | 2.5922808  | 0.7035874  |
| F  | 6.0886306  | 2.1252808  | 0.5445874  |
| F  | 4.9586306  | 3.8572808  | 1.0755874  |
| F  | 4.3026306  | 1.9322808  | 1.7185874  |
| S  | 3.8756306  | 2.4262808  | -0.8354126 |
| O  | 2.6066306  | 2.9752808  | -0.4354126 |
| O  | 3.8516306  | 1.0212808  | -1.0904126 |
| O  | 4.6096306  | 3.2132808  | -1.7834126 |
| N  | -0.4043694 | 4.1262808  | -1.3524126 |
| N  | 0.4036306  | -4.1267192 | 1.3525874  |
| C  | 1.6436306  | -4.6447192 | 1.5065874  |
| H  | 2.4366559  | -4.1902644 | 0.9072786  |
| C  | 1.9076306  | -5.6967192 | 2.3565874  |
| H  | 2.9254061  | -6.0858240 | 2.4266484  |
| C  | 0.8796306  | -6.2457192 | 3.0945874  |
| H  | 1.0638769  | -7.0857953 | 3.7687856  |
| C  | -0.3983694 | -5.6957192 | 2.9795874  |
| C  | -0.5943694 | -4.6507192 | 2.0885874  |
| H  | -1.5860118 | -4.2139840 | 1.9192370  |
| Ag | -0.1023694 | -2.5057192 | 0.0005874  |
| N  | -0.3343694 | -0.8317192 | -1.3564126 |
| C  | -1.5303694 | -0.2087192 | -1.4564126 |
| H  | -2.3343949 | -0.6001597 | -0.8251992 |
| C  | -1.7373694 | 0.8632808  | -2.2934126 |
| H  | -2.7280742 | 1.3195860  | -2.3329853 |
| C  | -0.6873694 | 1.3422808  | -3.0474126 |
| H  | -0.8188721 | 2.2053400  | -3.7044752 |
| C  | 0.5546306  | 0.7092808  | -2.9634126 |
| C  | 0.6916306  | -0.3747192 | -2.1094126 |
| H  | 1.6616308  | -0.8616894 | -1.9870042 |

|    |            |            |            |
|----|------------|------------|------------|
| C  | -4.8463694 | -2.5927192 | -0.7034126 |
| F  | -6.0893694 | -2.1247192 | -0.5444126 |
| F  | -4.9583694 | -3.8567192 | -1.0754126 |
| F  | -4.3023694 | -1.9317192 | -1.7184126 |
| S  | -3.8763694 | -2.4267192 | 0.8355874  |
| O  | -2.6063694 | -2.9747192 | 0.4345874  |
| O  | -3.8523694 | -1.0217192 | 1.0905874  |
| O  | -4.6093694 | -3.2137192 | 1.7835874  |
| C  | -1.6433694 | 4.6452808  | -1.5064126 |
| H  | -2.4367282 | 4.1912311  | -0.9071741 |
| C  | -1.9073694 | 5.6962808  | -2.3564126 |
| H  | -2.9251778 | 6.0853562  | -2.4263447 |
| C  | -0.8793694 | 6.2462808  | -3.0944126 |
| H  | -1.0635349 | 7.0864299  | -3.7684896 |
| C  | 0.3986306  | 5.6952808  | -2.9794126 |
| C  | 0.5946306  | 4.6502808  | -2.0884126 |
| H  | 1.5860380  | 4.2130951  | -1.9190743 |
| Ag | 0.1026306  | 2.5052808  | -0.0004126 |
| H  | -1.2457213 | -6.0839661 | 3.5468809  |
| H  | -1.4243004 | -1.0660882 | 3.5156023  |
| H  | 1.2461553  | 6.0834132  | -3.5465621 |
| H  | 1.4249430  | 1.0659573  | -3.5162388 |

### AWUTAP

|    |            |            |            |
|----|------------|------------|------------|
| N  | -3.5906045 | 1.2532638  | -2.4300236 |
| N  | -1.5006051 | 0.1132641  | -2.3270236 |
| C  | -2.2446049 | 1.2592638  | -2.2790236 |
| H  | -1.7251448 | 2.2122759  | -2.1546558 |
| C  | -2.2096049 | -1.0017356 | -2.5010236 |
| H  | -1.6284514 | -1.9288308 | -2.5221832 |
| C  | -3.5686045 | -1.0567356 | -2.6750235 |
| C  | -4.2326043 | 0.1412641  | -2.6180235 |
| H  | -5.3223985 | 0.2034530  | -2.7329889 |
| Ag | 0.6113943  | 0.1462641  | -1.9940237 |
| N  | 4.5383932  | 1.0452638  | -0.2310242 |
| N  | 2.6573937  | 0.0512641  | -1.2940239 |
| C  | 3.2973935  | 1.1022638  | -0.8420240 |
| H  | 2.8700217  | 2.0950113  | -1.0268678 |
| C  | 3.2613936  | -1.1597355 | -1.1050240 |
| H  | 2.6966437  | -2.0170281 | -1.4822430 |
| C  | 4.4883932  | -1.3557355 | -0.4960241 |
| C  | 5.1043930  | -0.1987358 | -0.0790242 |
| H  | 6.0863386  | -0.2019232 | 0.4063784  |

|   |            |            |            |
|---|------------|------------|------------|
| C | -1.1856052 | -1.5557354 | 0.5969756  |
| H | -1.7142199 | -2.4920766 | 0.3854414  |
| C | 0.1163944  | 0.8742639  | 1.1149754  |
| H | 0.6378340  | 1.8088549  | 1.3357426  |
| C | -1.2316052 | 0.8442639  | 0.8929755  |
| H | -1.8232743 | 1.7642520  | 0.9030875  |
| C | 0.1283944  | -1.5667354 | 0.8659755  |
| H | 0.7153980  | -2.4858735 | 0.9073653  |
| C | -1.9216050 | -0.4097357 | 0.7689755  |
| C | 0.7213943  | -0.3257358 | 1.2889754  |
| C | -3.3976046 | -0.4577357 | 0.9669755  |
| H | -3.8379744 | -1.3140614 | 0.4350527  |
| H | -3.8844653 | 0.4540154  | 0.5920406  |
| C | 2.0153939  | -0.4707357 | 2.1069751  |
| H | 2.6721208  | 0.4010440  | 1.9648263  |
| H | 2.5717269  | -1.3591781 | 1.7763266  |
| C | -0.5156054 | 0.4752640  | 4.0619746  |
| H | 0.0107280  | 1.4100909  | 4.2846235  |
| C | -1.8176050 | -1.9547353 | 3.5439747  |
| H | -2.3409071 | -2.8887118 | 3.3244179  |
| C | -0.4696054 | -1.9247353 | 3.7659747  |
| H | 0.1232107  | -2.8444197 | 3.7619069  |
| C | -1.8296050 | 0.4862640  | 3.7919747  |
| H | -2.4197435 | 1.4037497  | 3.7652405  |
| C | 0.2203944  | -0.6707357 | 3.8899746  |
| C | -2.4236049 | -0.7547356 | 3.3699748  |
| C | 1.6953940  | -0.6217357 | 3.6919747  |
| H | 2.1386892  | 0.2347507  | 4.2201952  |
| H | 2.1857821  | -1.5333551 | 4.0619440  |
| C | -3.7166045 | -0.6097357 | 2.5509750  |
| H | -4.3707377 | -1.4841653 | 2.6894179  |
| H | -4.2788352 | 0.2747941  | 2.8821833  |
| O | 0.6163943  | 1.6572637  | -4.4130230 |
| O | 0.9143942  | 3.9612630  | -5.4150227 |
| O | 2.0223939  | 3.2462632  | -3.3370233 |
| S | 1.3873941  | 2.8042634  | -4.5780230 |
| F | 3.3883935  | 1.3562638  | -4.9140229 |
| F | 2.1783939  | 2.3052635  | -6.8450223 |
| F | 3.4943935  | 3.4372632  | -5.7490226 |
| C | 2.7723937  | 2.3152635  | -5.6350227 |
| H | -4.0724696 | -2.0107468 | -2.8339867 |
| H | 4.9218645  | -2.3494142 | -0.3832031 |

**CUCSOI**

|    |            |            |            |
|----|------------|------------|------------|
| N  | 3.5764259  | 0.0001308  | 4.2964371  |
| C  | 3.9204259  | 0.0001308  | 5.3884371  |
| C  | 4.3114259  | 0.0001308  | 6.7744371  |
| C  | 4.4844259  | 1.2501308  | 7.4134371  |
| C  | 4.8314259  | 1.2291308  | 8.7834371  |
| C  | 5.0474259  | 0.0001308  | 9.4324371  |
| Ag | 2.0074259  | 0.0001308  | 2.8444371  |
| C  | 4.8314259  | -1.2288692 | 8.7834371  |
| C  | 4.4844259  | -1.2498692 | 7.4134371  |
| N  | 0.0814259  | 0.0001308  | 1.9424371  |
| C  | 3.9104259  | 1.2311308  | 0.4394371  |
| C  | 2.7394259  | 1.2381308  | -0.3565629 |
| C  | 2.1984259  | 0.0001308  | -0.7065629 |
| C  | 4.4484259  | 0.0001308  | 0.8614371  |
| N  | -0.0855741 | 0.0001308  | -1.9405629 |
| C  | 0.9324259  | 0.0001308  | -1.4285629 |
| C  | 2.7394259  | -1.2378692 | -0.3565629 |
| C  | 3.9104259  | -1.2308692 | 0.4394371  |
| Ag | -2.0115741 | 0.0001308  | -2.8415629 |
| C  | -3.9145741 | -1.2308692 | -0.4365629 |
| C  | -2.7445741 | -1.2378692 | 0.3594371  |
| C  | -2.2025741 | 0.0001308  | 0.7084371  |
| C  | -4.4525741 | 0.0001308  | -0.8585629 |
| C  | -0.9365741 | 0.0001308  | 1.4314371  |
| C  | -2.7445741 | 1.2381308  | 0.3594371  |
| C  | -3.9145741 | 1.2311308  | -0.4365629 |
| N  | -3.5805741 | 0.0001308  | -4.2935629 |
| C  | -3.9245741 | 0.0001308  | -5.3855629 |
| C  | -4.3155741 | 0.0001308  | -6.7725629 |
| C  | -4.4885741 | -1.2498692 | -7.4115629 |
| C  | -4.8355741 | -1.2288692 | -8.7805629 |
| C  | -5.0515741 | 0.0001308  | -9.4305629 |
| C  | -4.8355741 | 1.2291308  | -8.7805629 |
| C  | -4.4885741 | 1.2501308  | -7.4115629 |
| P  | -1.2265741 | -3.7008692 | -3.7195629 |
| F  | -1.3975741 | -2.8798692 | -2.3635629 |
| F  | -1.0485741 | -4.4458692 | -5.1045629 |
| F  | -1.6045741 | -2.3678692 | -4.5085629 |
| F  | -0.8485741 | -4.9988692 | -2.9095629 |
| F  | 0.3034259  | -3.2678692 | -3.7605629 |
| F  | -2.7695741 | -4.1008692 | -3.6985629 |
| P  | 1.2224259  | 3.7011308  | 3.7214371  |
| F  | 1.3934259  | 2.8801308  | 2.3664371  |

|   |            |            |             |
|---|------------|------------|-------------|
| F | 1.0444259  | 4.4461308  | 5.1074371   |
| F | 1.6004259  | 2.3681308  | 4.5114371   |
| F | 0.8444259  | 4.9991308  | 2.9124371   |
| F | -0.3075741 | 3.2681308  | 3.7624371   |
| F | 2.7654259  | 4.1011308  | 3.7014371   |
| H | -5.3429764 | 0.0005242  | -10.4837331 |
| H | -4.3063644 | -2.1784159 | -6.8667868  |
| H | -4.9742431 | 2.1666959  | -9.3227286  |
| H | -4.3329613 | 2.1834889  | -6.8693329  |
| H | -4.3472252 | -2.1729673 | -0.7775469  |
| H | -5.3320226 | -0.0025587 | -1.5069719  |
| H | -4.3747708 | 2.1714824  | -0.7454553  |
| H | -2.2754362 | 2.1650670  | 0.6953857   |
| H | -2.2607034 | -2.1733474 | 0.6409959   |
| H | 2.2702160  | -2.1648128 | -0.6923077  |
| H | 2.2554569  | 2.1735552  | -0.6380457  |
| H | 4.3706670  | -2.1714218 | 0.7476059   |
| H | 5.3279975  | 0.0029467  | 1.5096595   |
| H | 4.3289195  | -2.1832933 | 6.8712873   |
| H | 4.3020207  | 2.1787650  | 6.8688662   |
| H | 4.9708883  | -2.1663144 | 9.3255509   |
| H | 5.3388392  | -0.0003473 | 10.4856548  |
| H | 4.9648096  | 2.1678022  | 9.3246160   |
| H | -4.9691882 | -2.1675167 | -9.3217564  |
| H | 4.3427696  | 2.1732234  | 0.7808383   |

### KAPFOY

|   |           |            |            |
|---|-----------|------------|------------|
| C | 3.9174262 | -3.8427900 | -1.6087684 |
| H | 4.8616438 | -3.9000234 | -1.0413604 |
| H | 3.8617243 | -2.8705918 | -2.1280378 |
| C | 2.6244274 | -3.1467906 | 0.2902301  |
| C | 3.3834267 | -2.0557915 | 0.5772298  |
| H | 4.2009807 | -1.7557339 | -0.0800617 |
| C | 3.1004268 | -1.2967921 | 1.7072289  |
| H | 3.7345826 | -0.4326666 | 1.9215753  |
| C | 2.0754277 | -1.6257918 | 2.5302282  |
| H | 1.8702215 | -1.0345994 | 3.4259184  |
| C | 1.2914283 | -2.7017909 | 2.2342284  |
| H | 0.4732779 | -2.9803065 | 2.9079110  |
| C | 1.5224283 | -3.4977903 | 1.1252293  |
| O | 2.7924271 | -4.0367898 | -0.7527690 |
| N | 0.7694289 | -4.6417893 | 0.8212296  |
| H | 0.4539012 | -5.1590331 | 1.6331737  |

|    |            |            |            |
|----|------------|------------|------------|
| H  | 1.2311588  | -5.2321195 | 0.1373071  |
| N  | 4.1974259  | 1.3082057  | -2.5177676 |
| O  | 4.2604259  | 2.1602049  | -1.7167683 |
| O  | 3.3824267  | 0.4932064  | -2.5177676 |
| O  | 5.0494253  | 1.3712056  | -3.3187669 |
| C  | -1.6705690 | 1.9902051  | 2.4482283  |
| H  | -2.6151712 | 1.9509123  | 1.8795427  |
| H  | -1.6006087 | 2.9488400  | 2.9882728  |
| C  | -0.3765702 | 2.6862045  | 0.5492298  |
| C  | -1.1355696 | 3.7772036  | 0.2622301  |
| H  | -1.9725497 | 4.0566596  | 0.9043285  |
| C  | -0.8525699 | 4.5362029  | -0.8677690 |
| H  | -1.4752440 | 5.4100253  | -1.0769910 |
| C  | 0.1724294  | 4.2072032  | -1.6907683 |
| H  | 0.3985898  | 4.8117945  | -2.5715867 |
| C  | 0.9554286  | 3.1312041  | -1.3947685 |
| H  | 1.8357487  | 2.8826892  | -1.9989518 |
| C  | 0.7254289  | 2.3352048  | -0.2847695 |
| O  | -0.5445700 | 1.7962052  | 1.5922289  |
| N  | 1.4784283  | 1.1912058  | 0.0182303  |
| C  | -2.8975681 | -0.9787924 | 0.3872300  |
| C  | -3.7825672 | -1.0987923 | 1.3782292  |
| H  | -3.6626371 | -1.8684462 | 2.1446362  |
| C  | -4.8815663 | -0.2197930 | 1.4252291  |
| H  | -5.5988532 | -0.3161343 | 2.2433857  |
| C  | -5.0505663 | 0.7512061  | 0.4712299  |
| H  | -5.9082750 | 1.4256364  | 0.5194734  |
| C  | -4.1575669 | 0.8502061  | -0.5697693 |
| H  | -4.2840470 | 1.6151976  | -1.3355402 |
| C  | -3.0585679 | -0.0037932 | -0.6097692 |
| C  | -2.1095687 | 1.1362058  | -2.5107676 |
| H  | -2.0742061 | 2.1107378  | -1.9968169 |
| H  | -3.0045262 | 1.0698537  | -3.1503593 |
| N  | -1.7390259 | -1.8165268 | 0.2699025  |
| O  | -2.0705687 | 0.0632067  | -1.5707684 |
| Ag | 0.1544294  | -0.6107927 | 0.1972301  |
| H  | -1.7222953 | -2.5606338 | 0.9643459  |
| H  | -1.7096016 | -2.2597540 | -0.6498458 |
| H  | 2.2601311  | 1.0826026  | -0.6598694 |
| H  | 1.8888721  | 1.2545772  | 0.9503267  |
| H  | 3.8857657  | -4.6542185 | -2.3460869 |
| H  | -1.2086501 | 1.0260671  | -3.1255060 |
| H  | -1.6524935 | 1.1646966  | 3.1708762  |



## QANZOX

|    |            |            |            |
|----|------------|------------|------------|
| Ag | 2.3533554  | -0.0770021 | -0.0237228 |
| N  | 3.9313549  | 0.5559978  | 1.2832768  |
| N  | 0.7363558  | -0.7860019 | -1.2787225 |
| C  | 4.3283548  | 1.8129974  | 1.2182768  |
| H  | 3.8334213  | 2.4756799  | 0.5038994  |
| C  | 5.3643545  | 2.3109973  | 2.0502766  |
| H  | 5.6615814  | 3.3573377  | 1.9539996  |
| C  | 5.9753543  | 1.4579975  | 2.9552763  |
| C  | 5.4973545  | 0.1239979  | 2.9872763  |
| H  | 5.9257485  | -0.6073742 | 3.6754859  |
| C  | 4.5233547  | -0.2680020 | 2.1492766  |
| H  | 4.1657741  | -1.3057041 | 2.1679881  |
| C  | 0.2143560  | 0.0509979  | -2.1787222 |
| H  | 0.5809266  | 1.0799176  | -2.2020993 |
| C  | -0.7806438 | -0.3460020 | -3.0347220 |
| H  | -1.2056801 | 0.3811455  | -3.7289557 |
| C  | -1.2696436 | -1.6960016 | -2.9787220 |
| C  | -0.7146438 | -2.5170014 | -2.0337223 |
| H  | -1.0333640 | -3.5562865 | -1.9231151 |
| C  | 0.2623559  | -2.0480015 | -1.1887225 |
| H  | 0.7187065  | -2.6981348 | -0.4321304 |
| P  | 2.5133553  | -4.0120010 | 1.9382766  |
| F  | 3.2033551  | -5.3800006 | 1.6062767  |
| F  | 1.9313555  | -4.6620008 | 3.2042763  |
| F  | 3.8123549  | -3.5400011 | 2.7662764  |
| F  | 1.8603555  | -2.6360013 | 2.2442765  |
| F  | 3.1393551  | -3.3540011 | 0.6482770  |
| F  | 1.2573557  | -4.4750008 | 1.1152768  |
| Ag | -2.3536433 | 0.0769979  | 0.0242771  |
| N  | -3.9306429 | -0.5560019 | -1.2837225 |
| N  | -0.7366438 | 0.7859977  | 1.2782768  |
| C  | -4.3286428 | -1.8130016 | -1.2177225 |
| H  | -3.8338399 | -2.4755500 | -0.5031407 |
| C  | -5.3646425 | -2.3110014 | -2.0497223 |
| H  | -5.6620240 | -3.3572816 | -1.9532116 |
| C  | -5.9756423 | -1.4580017 | -2.9557220 |
| C  | -5.4976424 | -0.1240020 | -2.9867220 |
| H  | -5.9262533 | 0.6075022  | -3.6746968 |
| C  | -4.5236427 | 0.2679978  | -2.1497222 |
| H  | -4.1658420 | 1.3056152  | -2.1688069 |
| C  | -0.2146439 | -0.0510021 | 2.1782765  |
| H  | -0.5809341 | -1.0800172 | 2.2015974  |

|   |            |            |            |
|---|------------|------------|------------|
| C | 0.7803558  | 0.3459978  | 3.0342763  |
| H | 1.2051808  | -0.3816535 | 3.7281486  |
| C | 1.2703557  | 1.6959974  | 2.9792763  |
| C | 0.7143558  | 2.5169972  | 2.0342766  |
| H | 1.0326921  | 3.5564008  | 1.9235571  |
| C | -0.2626439 | 2.0479973  | 1.1892768  |
| H | -0.7187940 | 2.6985012  | 0.4328754  |
| P | -2.5136433 | 4.0119968  | -1.9377223 |
| F | -3.2036431 | 5.3799964  | -1.6067224 |
| F | -1.9316434 | 4.6619966  | -3.2047219 |
| F | -3.8116429 | 3.5399969  | -2.7667221 |
| F | -1.8606435 | 2.6359972  | -2.2437222 |
| F | -3.1396431 | 3.3539970  | -0.6487227 |
| F | -1.2566436 | 4.4749967  | -1.1157225 |
| H | -6.7765722 | -1.7935364 | -3.6172151 |
| H | -2.0547842 | -2.0310843 | -3.6590113 |
| H | 2.0557449  | 2.0306514  | 3.6594324  |
| H | 6.7765424  | 1.7934740  | 3.6165287  |

## QUJJIR

|    |            |            |            |
|----|------------|------------|------------|
| Au | 6.4100245  | 4.0530618  | -2.5914429 |
| Ag | 1.7230258  | 1.2060626  | 1.4565559  |
| Cl | 7.8330241  | 5.8500613  | -2.6794429 |
| N  | 4.2890250  | 1.9630623  | -1.8094432 |
| N  | 1.3240259  | -0.7769369 | 1.1355560  |
| N  | 0.7690260  | 1.1040626  | 3.2775554  |
| N  | 2.1430257  | 3.1660620  | 1.7565558  |
| N  | 5.6370247  | 1.3100625  | -3.3224427 |
| C  | 3.4280253  | 2.4240622  | -0.7404435 |
| C  | 4.0470251  | 0.6070627  | -2.0024431 |
| C  | 3.0720254  | 0.1640629  | -1.0304434 |
| C  | 2.5520255  | -1.1279368 | -0.9554434 |
| C  | 1.6610258  | -1.5209367 | 0.0405563  |
| C  | 0.9830260  | -2.7869363 | 0.0885563  |
| H  | 1.0697191  | -3.5672271 | -0.6658870 |
| C  | 0.2250262  | -2.7879363 | 1.2315560  |
| H  | -0.4307892 | -3.5740488 | 1.6018084  |
| C  | 0.4600261  | -1.5389367 | 1.9105558  |
| C  | -0.0369737 | -1.2369368 | 3.1715554  |
| C  | 0.2130262  | -0.0229371 | 3.8475552  |
| C  | -0.0199737 | 0.2300628  | 5.2415549  |
| H  | -0.4428873 | -0.4941131 | 5.9364079  |
| C  | 0.3700261  | 1.5040625  | 5.4975548  |

|    |            |            |            |
|----|------------|------------|------------|
| H  | 0.3332418  | 2.0374645  | 6.4464565  |
| C  | 0.8450260  | 2.0670623  | 4.2695551  |
| C  | 1.2480259  | 3.3890619  | 4.0735552  |
| C  | 1.7280258  | 3.8890618  | 2.8525555  |
| C  | 1.8610257  | 5.2870614  | 2.5625556  |
| H  | 1.6066110  | 6.0798061  | 3.2645720  |
| C  | 2.3150256  | 5.4050614  | 1.3025560  |
| H  | 2.5498750  | 6.3139464  | 0.7503898  |
| C  | 2.5610255  | 4.0750618  | 0.8045561  |
| C  | 3.2580253  | 3.7770618  | -0.3854436 |
| C  | 2.7600255  | 1.2900625  | -0.2554436 |
| C  | 4.8960249  | 0.2090628  | -2.9974428 |
| H  | 5.0457420  | -0.7597015 | -3.4645791 |
| C  | 5.2950248  | 2.3920622  | -2.5794430 |
| C  | 6.6040244  | 1.2980625  | -4.4254424 |
| H  | 7.0374637  | 0.2932381  | -4.5069650 |
| H  | 7.3969360  | 2.0263301  | -4.2150909 |
| H  | 6.1083545  | 1.5687580  | -5.3687779 |
| Au | -6.4099719 | -4.0529360 | 2.5915556  |
| Ag | -1.7229733 | -1.2059368 | -1.4564433 |
| Cl | -7.8329715 | -5.8499355 | 2.6795556  |
| N  | -4.2889725 | -1.9629365 | 1.8095558  |
| N  | -1.3239734 | 0.7760627  | -1.1354434 |
| N  | -0.7689735 | -1.1039368 | -3.2784428 |
| N  | -2.1429731 | -3.1659362 | -1.7564432 |
| N  | -5.6369722 | -1.3099367 | 3.3225554  |
| C  | -3.4279728 | -2.4239364 | 0.7405561  |
| C  | -4.0469726 | -0.6069369 | 2.0025558  |
| C  | -3.0719729 | -0.1639371 | 1.0305560  |
| C  | -2.5519730 | 1.1280626  | 0.9545561  |
| C  | -1.6609733 | 1.5210625  | -0.0414437 |
| C  | -0.9829735 | 2.7870621  | -0.0884436 |
| H  | -1.0700607 | 3.5670739  | 0.6661879  |
| C  | -0.2249737 | 2.7880621  | -1.2314433 |
| H  | 0.4310400  | 3.5740599  | -1.6018173 |
| C  | -0.4599736 | 1.5390625  | -1.9104431 |
| C  | 0.0370262  | 1.2370626  | -3.1714428 |
| C  | -0.2139737 | 0.0230629  | -3.8474426 |
| C  | 0.0200262  | -0.2299370 | -5.2414422 |
| H  | 0.4430533  | 0.4943067  | -5.9362620 |
| C  | -0.3699736 | -1.5039367 | -5.4974421 |
| H  | -0.3328193 | -2.0374205 | -6.4463446 |
| C  | -0.8449735 | -2.0669365 | -4.2694425 |
| C  | -1.2479734 | -3.3899361 | -4.0734425 |

|   |            |            |            |
|---|------------|------------|------------|
| C | -1.7279733 | -3.8889360 | -2.8524429 |
| C | -1.8609732 | -5.2879356 | -2.5624430 |
| H | -1.6065465 | -6.0807456 | -3.2643515 |
| C | -2.3149731 | -5.4049356 | -1.3024433 |
| H | -2.5498679 | -6.3135332 | -0.7498356 |
| C | -2.5609730 | -4.0749360 | -0.8044434 |
| C | -3.2579728 | -3.7769360 | 0.3855562  |
| C | -2.7599730 | -1.2899367 | 0.2555563  |
| C | -4.8959724 | -0.2099370 | 2.9975555  |
| H | -5.0455001 | 0.7588276  | 3.4647132  |
| C | -5.2949723 | -2.3919364 | 2.5795556  |
| C | -6.6039719 | -1.2979367 | 4.4255551  |
| H | -7.0373749 | -0.2931249 | 4.5070811  |
| H | -7.3968380 | -2.0261935 | 4.2151465  |
| H | -6.1083019 | -1.5686608 | 5.3688407  |
| H | -2.8073402 | 1.8579778  | 1.7235441  |
| H | -0.6049075 | -2.0082466 | 3.6925701  |
| H | 1.1277392  | 4.0944332  | 4.8962729  |
| H | 3.7182660  | 4.5741288  | -0.9707153 |
| H | 2.8072702  | -1.8576244 | -1.7247793 |
| H | 0.6050331  | 2.0082240  | -3.6928102 |
| H | -1.1272377 | -4.0953744 | -4.8960575 |
| H | -3.7181547 | -4.5739569 | 0.9707824  |

## SOYKID

|    |            |            |            |
|----|------------|------------|------------|
| F  | -1.1179887 | 4.3038603  | 3.0323700  |
| F  | -1.1759887 | 5.0698603  | 1.1013700  |
| F  | -2.7949887 | 4.0018603  | 1.8713700  |
| F  | 2.0740113  | -3.1241397 | -2.3366300 |
| F  | 0.1580113  | -3.7371397 | -2.1456300 |
| F  | 1.5870113  | -4.1181397 | -0.7196300 |
| O  | -0.7419887 | 2.6918603  | 0.0643700  |
| O  | -0.6569887 | 1.8538603  | 2.0833700  |
| O  | 0.6370113  | -0.9851397 | -1.5866300 |
| O  | 0.5690113  | -1.9501397 | 0.3783700  |
| C  | -0.9239887 | 2.7208603  | 1.2543700  |
| C  | -1.4739887 | 4.0318603  | 1.7943700  |
| C  | 0.7050113  | -1.9241397 | -0.8266300 |
| C  | 1.0820113  | -3.2331397 | -1.5016300 |
| Ag | 0.0260113  | -0.2031397 | 1.6043700  |
| Ag | 0.3530113  | 1.0838603  | -1.0136300 |
| O  | 0.2260113  | -3.9831397 | 3.2773700  |
| O  | -3.7199887 | -0.1041397 | 3.0973700  |

|   |            |            |            |
|---|------------|------------|------------|
| O | 4.1320113  | -1.5431397 | 1.2893700  |
| O | 1.1060113  | 1.1268603  | 5.0783700  |
| O | 3.8520113  | 0.1118603  | -3.3796300 |
| O | 2.8990113  | 3.4148603  | 0.9543700  |
| O | -0.9979887 | -1.2871397 | -5.0156300 |
| O | -0.0269887 | 3.7778603  | -3.0146300 |
| O | -3.1569887 | -3.8041397 | -0.7246300 |
| O | -4.1999887 | 1.5328603  | -1.7286300 |
| C | -4.0649887 | -2.2971397 | 1.4363700  |
| H | -4.9281635 | -1.8018900 | 1.9008028  |
| H | -4.3019209 | -3.3618449 | 1.3136485  |
| C | -2.8689887 | -2.1611397 | 2.3573700  |
| C | -1.8859887 | -3.1521397 | 2.4003700  |
| H | -2.0135639 | -4.0149950 | 1.7464152  |
| C | -0.7639887 | -3.0261397 | 3.1993700  |
| C | -0.5859887 | -1.8891397 | 3.9933700  |
| C | -1.5829887 | -0.8981397 | 3.9603700  |
| H | -1.4317188 | -0.0087651 | 4.5732466  |
| C | -2.7089887 | -1.0341397 | 3.1583700  |
| C | 0.2110113  | -5.0231397 | 2.3083700  |
| H | 0.2288838  | -4.6126665 | 1.2867850  |
| H | -0.6657426 | -5.6821054 | 2.4321615  |
| C | -3.6069887 | 1.0468603  | 3.9363700  |
| H | -2.7098368 | 1.6366114  | 3.6856516  |
| H | -3.5799384 | 0.7638916  | 5.0024833  |
| C | 0.6630113  | -1.6581397 | 4.8103700  |
| H | 1.0845750  | -2.6250789 | 5.1159761  |
| H | 0.4116408  | -1.0894096 | 5.7148366  |
| C | 1.6920113  | -0.8941397 | 4.0023700  |
| C | 2.4660113  | -1.5801397 | 3.0693700  |
| H | 2.3130940  | -2.6559440 | 2.9841424  |
| C | 3.3540113  | -0.9221397 | 2.2423700  |
| C | 3.4990113  | 0.4658603  | 2.3253700  |
| C | 2.7330113  | 1.1488603  | 3.2593700  |
| H | 2.8396380  | 2.2320878  | 3.3073701  |
| C | 1.8420113  | 0.4898603  | 4.0993700  |
| C | 4.1590113  | -2.9621397 | 1.2773700  |
| H | 3.1720843  | -3.3821738 | 1.0251447  |
| H | 4.4941475  | -3.3671987 | 2.2479640  |
| C | 1.0660113  | 2.5508603  | 5.0543700  |
| H | 0.6792823  | 2.9198567  | 4.0915667  |
| H | 2.0584558  | 2.9883111  | 5.2584172  |
| C | 4.4730113  | 1.1888603  | 1.4243700  |
| H | 5.3706790  | 0.5680392  | 1.3010642  |

|   |            |            |            |
|---|------------|------------|------------|
| H | 4.7671516  | 2.1333061  | 1.9023018  |
| C | 3.8980113  | 1.4938603  | 0.0523700  |
| C | 4.1600113  | 0.6578603  | -1.0216300 |
| H | 4.7611435  | -0.2300342 | -0.8366690 |
| C | 3.6290113  | 0.9228603  | -2.2826300 |
| C | 2.8360113  | 2.0468603  | -2.4906300 |
| C | 2.5900113  | 2.8908603  | -1.4106300 |
| H | 1.9698757  | 3.7711287  | -1.5836930 |
| C | 3.1100113  | 2.6188603  | -0.1546300 |
| C | 4.6370113  | -1.0561397 | -3.1476300 |
| H | 4.1528091  | -1.7248841 | -2.4180729 |
| H | 5.6539520  | -0.8000121 | -2.8051967 |
| C | 2.3660113  | 4.7078603  | 0.7513700  |
| H | 1.3272793  | 4.6697991  | 0.3808143  |
| H | 2.9789940  | 5.2930670  | 0.0437153  |
| C | 2.2070113  | 2.3278603  | -3.8396300 |
| H | 2.1721089  | 3.4141047  | -4.0014104 |
| H | 2.8277866  | 1.8801778  | -4.6259827 |
| C | 0.8020113  | 1.7688603  | -3.9306300 |
| C | 0.5640113  | 0.4998603  | -4.4556300 |
| H | 1.4236113  | -0.0694773 | -4.8089951 |
| C | -0.7109887 | -0.0471397 | -4.4816300 |
| C | -1.7919887 | 0.6528603  | -3.9426300 |
| C | -1.5639887 | 1.9328603  | -3.4386300 |
| H | -2.4114554 | 2.4721592  | -3.0188319 |
| C | -0.2909887 | 2.4928603  | -3.4476300 |
| C | 0.0620113  | -1.9901397 | -5.6666300 |
| H | 0.8599827  | -2.2622139 | -4.9546959 |
| H | 0.4924536  | -1.3969933 | -6.4916236 |
| C | -1.1339887 | 4.5708603  | -2.5636300 |
| H | -1.5951409 | 4.1299710  | -1.6674796 |
| H | -1.8836633 | 4.6956149  | -3.3630724 |
| C | -3.1839887 | 0.0558603  | -3.8526300 |
| H | -3.2958510 | -0.7191363 | -4.6215157 |
| H | -3.9267353 | 0.8426813  | -4.0418138 |
| C | -3.4419887 | -0.5541397 | -2.4846300 |
| C | -3.1819887 | -1.8951397 | -2.2506300 |
| H | -2.7934591 | -2.4912901 | -3.0772800 |
| C | -3.3799887 | -2.4651397 | -0.9966300 |
| C | -3.8309887 | -1.6901397 | 0.0643700  |
| C | -4.0849887 | -0.3441397 | -0.1676300 |
| H | -4.4320013 | 0.2581379  | 0.6726912  |
| C | -3.9079887 | 0.2198603  | -1.4236300 |
| C | -2.9779887 | -4.6771397 | -1.8276300 |

|   |            |            |            |
|---|------------|------------|------------|
| H | -2.0475128 | -4.4662516 | -2.3763408 |
| H | -3.8301472 | -4.6212101 | -2.5275086 |
| C | -4.6629887 | 2.3818603  | -0.6906300 |
| H | -3.9150837 | 2.4959753  | 0.1117812  |
| H | -5.6077620 | 2.0138988  | -0.2543273 |
| H | 1.1216166  | -5.6122343 | 2.4785684  |
| H | 0.3769631  | 2.8476862  | 5.8553608  |
| H | 2.3719345  | 5.2043110  | 1.7307083  |
| H | 4.8769754  | -3.2497733 | 0.4982398  |
| H | -2.9208268 | -5.6915246 | -1.4109817 |
| H | -0.3862276 | -2.9057515 | -6.0730473 |
| H | -4.8406640 | 3.3623251  | -1.1513681 |
| H | -0.7122757 | 5.5504257  | -2.3051100 |
| H | -4.5024333 | 1.6513720  | 3.7447601  |
| H | 4.7039816  | -1.5728210 | -4.1136287 |

## SUDLUA

|    |            |            |            |
|----|------------|------------|------------|
| Au | 4.4345175  | -0.7170108 | -3.5183983 |
| S  | -2.9104618 | -2.0640070 | -3.0783997 |
| O  | -0.2694692 | -2.9690043 | -5.2103937 |
| N  | -4.0594585 | -2.4890059 | -5.3823933 |
| H  | -4.0969137 | -2.5031748 | -6.3922925 |
| N  | -2.2164637 | -1.1500095 | -5.5803927 |
| N  | 2.9555218  | 0.5099860  | -4.2573963 |
| N  | 2.3125235  | 2.7859794  | -4.4743959 |
| N  | 0.0615298  | 3.3759779  | -4.5963953 |
| H  | -0.9078583 | 3.0837678  | -4.3527337 |
| C  | -5.0554558 | -3.2690036 | -4.6733953 |
| H  | -4.6031404 | -4.1421751 | -4.1782238 |
| H  | -5.8054699 | -3.6104546 | -5.3978303 |
| H  | -5.5496405 | -2.6606572 | -3.9019495 |
| C  | -3.0324615 | -1.8820075 | -4.8073949 |
| C  | -0.9074675 | -0.7280107 | -5.1673939 |
| C  | 0.1185298  | -1.7000080 | -4.9983943 |
| C  | 1.3835262  | -1.2830090 | -4.6593953 |
| H  | 2.1967173  | -1.9886935 | -4.4861419 |
| C  | 1.6745253  | 0.0829870  | -4.5523953 |
| C  | 0.6645282  | 1.0449843  | -4.7643951 |
| C  | -0.6424682 | 0.5969857  | -5.0783942 |
| H  | -1.4701050 | 1.3090870  | -5.1666242 |
| C  | 3.1915211  | 1.7999821  | -4.2943963 |
| H  | 4.2230605  | 2.1202396  | -4.0627527 |
| C  | 1.0165272  | 2.4249804  | -4.6193953 |

|    |            |            |            |
|----|------------|------------|------------|
| C  | -2.4774629 | -1.0270100 | -7.0293886 |
| H  | -2.2816587 | -1.9779878 | -7.5556903 |
| H  | -1.8050623 | -0.2621912 | -7.4307124 |
| H  | -3.5128778 | -0.6976891 | -7.2066176 |
| C  | 0.7245281  | -4.0300015 | -5.1353941 |
| H  | 1.0491898  | -4.1328715 | -4.0853707 |
| H  | 1.6023176  | -3.7410688 | -5.7386945 |
| C  | 0.0715298  | -5.2479980 | -5.6553923 |
| H  | -0.8194055 | -5.4983568 | -5.0605253 |
| H  | 0.7605935  | -6.1045217 | -5.6152765 |
| H  | -0.2397891 | -5.1088706 | -6.7011045 |
| Au | -1.2964663 | -0.7170108 | -2.2744021 |
| S  | 6.0495131  | -2.0640070 | -2.7144007 |
| O  | 3.4085205  | -2.9690043 | -0.5824067 |
| N  | 7.1975098  | -2.4890059 | -0.4114072 |
| H  | 7.1820805  | -2.5673595 | 0.5970300  |
| N  | 5.3545151  | -1.1500095 | -0.2134078 |
| N  | 0.1825295  | 0.5099860  | -1.5364042 |
| N  | 0.8255278  | 2.7859794  | -1.3184046 |
| N  | 3.0765213  | 3.3759779  | -1.1964051 |
| H  | 4.0530445  | 3.0835796  | -1.4515532 |
| C  | 8.1935071  | -3.2690036 | -1.1204052 |
| H  | 7.7483472  | -4.1565849 | -1.5976770 |
| H  | 8.9560557  | -3.5894129 | -0.3990941 |
| H  | 8.6712191  | -2.6621628 | -1.9028247 |
| C  | 6.1705128  | -1.8820075 | -0.9864053 |
| C  | 4.0455187  | -0.7280107 | -0.6254063 |
| C  | 3.0195215  | -1.7000080 | -0.7944062 |
| C  | 1.7555252  | -1.2830090 | -1.1344052 |
| H  | 0.9424465  | -1.9936617 | -1.2856398 |
| C  | 1.4635260  | 0.0829870  | -1.2414049 |
| C  | 2.4735232  | 1.0449843  | -1.0284053 |
| C  | 3.7815195  | 0.5969857  | -0.7144063 |
| H  | 4.6103108  | 1.3095683  | -0.6311822 |
| C  | -0.0534698 | 1.7999821  | -1.4994042 |
| H  | -1.0839232 | 2.1125675  | -1.7292760 |
| C  | 2.1215241  | 2.4249804  | -1.1734052 |
| C  | 5.6165143  | -1.0270100 | 1.2365881  |
| H  | 5.2204554  | -1.8937907 | 1.7964410  |
| H  | 5.0768778  | -0.1442410 | 1.5999355  |
| H  | 6.6890291  | -0.8659207 | 1.4153279  |
| C  | 2.4135233  | -4.0300015 | -0.6584063 |
| H  | 2.0923540  | -4.1251283 | -1.7118363 |
| H  | 1.5372374  | -3.7518350 | -0.0491605 |



|    |            |            |            |
|----|------------|------------|------------|
| C  | 3.0665215  | -5.2479980 | -0.1374081 |
| H  | 3.9731561  | -5.4899751 | -0.7120163 |
| H  | 2.3805612  | -6.1065064 | -0.1898238 |
| H  | 3.3402610  | -5.0867656 | 0.9165939  |
| Cl | 5.9785132  | 2.7079797  | -2.4104013 |
| Cl | -2.8404619 | 2.7079797  | -3.3833989 |
| Cl | 2.8405221  | -2.7080050 | 3.3825821  |
| Au | -4.4354575 | 0.7169851  | 3.5185817  |
| S  | 2.9105218  | 2.0639815  | 3.0785828  |
| O  | 0.2695293  | 2.9689790  | 5.2105769  |
| N  | 4.0595187  | 2.4889802  | 5.3825767  |
| H  | 4.0972261  | 2.5034755  | 6.3924547  |
| N  | 2.2165238  | 1.1499840  | 5.5805758  |
| N  | -2.9554617 | -0.5100113 | 4.2565797  |
| N  | -2.3124635 | -2.7860050 | 4.4745789  |
| N  | -0.0614698 | -3.3760032 | 4.5965787  |
| H  | 0.9077483  | -3.0836118 | 4.3526055  |
| C  | 5.0545158  | 3.2689780  | 4.6725787  |
| H  | 4.6014868  | 4.1416216  | 4.1771253  |
| H  | 5.8048374  | 3.6113553  | 5.3962812  |
| H  | 5.5486468  | 2.6604739  | 3.9012229  |
| C  | 3.0325215  | 1.8819820  | 4.8075781  |
| C  | 0.9075275  | 0.7279851  | 5.1675771  |
| C  | -0.1184697 | 1.6999825  | 4.9985777  |
| C  | -1.3834660 | 1.2829837  | 4.6595787  |
| H  | -2.1966351 | 1.9886602  | 4.4861679  |
| C  | -1.6744652 | -0.0830125 | 4.5525788  |
| C  | -0.6644681 | -1.0450099 | 4.7645783  |
| C  | 0.6425282  | -0.5970110 | 5.0785774  |
| H  | 1.4701433  | -1.3091136 | 5.1668557  |
| C  | -3.1914609 | -1.8000077 | 4.2945797  |
| H  | -4.2230416 | -2.1203004 | 4.0631130  |
| C  | -1.0164671 | -2.4250060 | 4.6195787  |
| C  | 2.4775231  | 1.0269844  | 7.0295718  |
| H  | 2.2816344  | 1.9779394  | 7.5558835  |
| H  | 1.8051901  | 0.2621031  | 7.4308892  |
| H  | 3.5129683  | 0.6977559  | 7.2067947  |
| C  | -0.7244679 | 4.0299760  | 5.1355772  |
| H  | -1.0491482 | 4.1328482  | 4.0855583  |
| H  | -1.6022671 | 3.7410428  | 5.7388652  |
| C  | -0.0714698 | 5.2479725  | 5.6555757  |
| H  | 0.8194689  | 5.4983322  | 5.0607127  |
| H  | -0.7605353 | 6.1044957  | 5.6154597  |
| H  | 0.2398541  | 5.1088456  | 6.7012868  |

|    |            |            |            |
|----|------------|------------|------------|
| Au | 1.2965263  | 0.7169851  | 2.2745852  |
| S  | -6.0494529 | 2.0639815  | 2.7145839  |
| O  | -3.4084605 | 2.9689790  | 0.5825899  |
| N  | -7.1974498 | 2.4889802  | 0.4115907  |
| H  | -7.1829710 | 2.5668288  | -0.5969183 |
| N  | -5.3544549 | 1.1499840  | 0.2135909  |
| N  | -0.1824695 | -0.5100113 | 1.5365874  |
| N  | -0.8254677 | -2.7860050 | 1.3185878  |
| N  | -3.0764613 | -3.3760032 | 1.1965883  |
| H  | -4.0534804 | -3.0840330 | 1.4505309  |
| C  | -8.1934469 | 3.2689780  | 1.1205887  |
| H  | -7.7482216 | 4.1565566  | 1.5977733  |
| H  | -8.9559656 | 3.5893311  | 0.3992293  |
| H  | -8.6711046 | 2.6621808  | 1.9030724  |
| C  | -6.1704527 | 1.8819820  | 0.9855888  |
| C  | -4.0454587 | 0.7279851  | 0.6255898  |
| C  | -3.0194615 | 1.6999825  | 0.7945897  |
| C  | -1.7554650 | 1.2829837  | 1.1345887  |
| H  | -0.9423774 | 1.9935865  | 1.2859931  |
| C  | -1.4634658 | -0.0830125 | 1.2405881  |
| C  | -2.4734630 | -1.0450099 | 1.0285887  |
| C  | -3.7814593 | -0.5970110 | 0.7145897  |
| H  | -4.6103781 | -1.3095257 | 0.6317745  |
| C  | 0.0535299  | -1.8000077 | 1.4995877  |
| H  | 1.0839326  | -2.1126591 | 1.7296239  |
| C  | -2.1214639 | -2.4250060 | 1.1735884  |
| C  | -5.6164542 | 1.0269844  | -1.2364049 |
| H  | -5.2204440 | 1.8938007  | -1.7962238 |
| H  | -5.0768173 | 0.1442489  | -1.5998321 |
| H  | -6.6889634 | 0.8658438  | -1.4151400 |
| C  | -2.4134632 | 4.0299760  | 0.6585898  |
| H  | -2.0923515 | 4.1251227  | 1.7120337  |
| H  | -1.5371204 | 3.7518560  | 0.0493988  |
| C  | -3.0664613 | 5.2479725  | 0.1375913  |
| H  | -3.9730972 | 5.4899508  | 0.7121979  |
| H  | -2.3804783 | 6.1064614  | 0.1899939  |
| H  | -3.3402086 | 5.0867606  | -0.9164127 |
| Cl | -5.9784532 | -2.7080050 | 2.4105848  |
| C  | 0.2802704  | 4.8227905  | -4.4557766 |
| H  | 0.3781337  | 5.0901891  | -3.3912458 |
| H  | 1.1980400  | 5.1141615  | -4.9820774 |
| H  | -0.5905313 | 5.3378154  | -4.8807338 |
| C  | 2.8588144  | 4.8228442  | -1.3380705 |
| H  | 3.7713111  | 5.3275429  | -0.9973397 |

|   |            |            |            |
|---|------------|------------|------------|
| H | 2.6765753  | 5.0815609  | -2.3935026 |
| H | 1.9943919  | 5.1361607  | -0.7380249 |
| C | -2.8587543 | -4.8228695 | 1.3382541  |
| H | -1.9593198 | -5.1241199 | 0.7858640  |
| H | -2.7347515 | -5.0876458 | 2.4006055  |
| H | -3.7461096 | -5.3326639 | 0.9426211  |
| C | -0.2801955 | -4.8227173 | 4.4549277  |
| H | -0.3878328 | -5.0883879 | 3.3909137  |
| H | 0.5950695  | -5.3372907 | 4.8710590  |
| H | -1.1928532 | -5.1162551 | 4.9889137  |

### SUMREA

|    |            |            |            |
|----|------------|------------|------------|
| Ag | -1.2170611 | 2.9824594  | 0.2757634  |
| Ag | 1.4639389  | 3.4134594  | -0.2362366 |
| O  | -0.9860611 | 1.2344594  | -1.0172366 |
| O  | 1.1719389  | 1.4224594  | -1.1292366 |
| C  | 0.1719389  | -2.7665406 | -3.7162366 |
| C  | -1.0310611 | -2.2635406 | -3.2722366 |
| H  | -1.9817396 | -2.7611777 | -3.4562124 |
| C  | -0.9400611 | -1.1185406 | -2.4722366 |
| H  | -1.8890490 | -0.7173881 | -2.0914013 |
| C  | 0.1389389  | -0.4735406 | -2.1162366 |
| C  | 1.2929389  | -0.9615406 | -2.7462366 |
| H  | 2.2125323  | -0.3840166 | -2.5768398 |
| C  | 1.3839389  | -2.0815406 | -3.5672366 |
| H  | 2.3217866  | -2.4214680 | -4.0045033 |
| C  | 0.1999389  | 0.9024594  | -1.3732366 |
| O  | 0.9789389  | 5.0484594  | 1.1027634  |
| O  | -1.2090611 | 4.7944594  | 1.3667634  |
| Ag | -1.2170611 | -3.2745406 | 0.2757634  |
| Ag | 1.4639389  | -2.8435406 | -0.2362366 |
| O  | -0.9860611 | -5.0225406 | -1.0172366 |
| O  | 1.1719389  | -4.8345406 | -1.1292366 |
| C  | 0.1719389  | -9.0235406 | -3.7162366 |
| C  | -1.0310611 | -8.5205406 | -3.2722366 |
| H  | -1.9855035 | -9.0079116 | -3.4670154 |
| C  | -0.9400611 | -7.3755406 | -2.4722366 |
| H  | -1.8909618 | -6.9738420 | -2.0964810 |
| C  | 0.1389389  | -6.7305406 | -2.1162366 |
| C  | 1.2929389  | -7.2185406 | -2.7462366 |
| H  | 2.2154274  | -6.6492231 | -2.5676356 |
| C  | 1.3839389  | -8.3385406 | -3.5672366 |
| H  | 2.3233488  | -8.6796316 | -4.0004011 |

|   |            |            |            |
|---|------------|------------|------------|
| C | 0.1999389  | -5.3545406 | -1.3732366 |
| O | 0.9789389  | -1.2085406 | 1.1027634  |
| O | -1.2090611 | -1.4625406 | 1.3667634  |
| C | -0.2570611 | 2.7024594  | 3.9207634  |
| C | 0.8619389  | 2.3294594  | 3.1237634  |
| H | 1.7566079  | 2.9589521  | 3.1731039  |
| C | 0.8949389  | 1.2534594  | 2.3337634  |
| H | 1.8251319  | 1.0234137  | 1.8040921  |
| C | -0.1010611 | 0.3964594  | 2.2657634  |
| C | -1.1600611 | 0.7344594  | 2.7037634  |
| H | -2.0560807 | 0.1274787  | 2.5681534  |
| C | -1.3470611 | 1.9294594  | 3.6087634  |
| H | -2.3400412 | 2.0981191  | 4.0317360  |
| C | -0.0810611 | -0.8235406 | 1.5437634  |
| C | -0.2570611 | 8.9594594  | 3.9207634  |
| C | 0.8619389  | 8.5864594  | 3.1237634  |
| H | 1.7591576  | 9.2128145  | 3.1723954  |
| C | 0.8949389  | 7.5104594  | 2.3337634  |
| H | 1.8213558  | 7.2946176  | 1.7935318  |
| C | -0.1010611 | 6.6534594  | 2.2657634  |
| C | -1.1600611 | 6.9914594  | 2.7037634  |
| H | -2.0571215 | 6.3852248  | 2.5718879  |
| C | -1.3470611 | 8.1864594  | 3.6087634  |
| H | -2.3391017 | 8.3498391  | 4.0369692  |
| C | -0.0810611 | 5.4334594  | 1.5437634  |
| H | 0.1663916  | -9.9474754 | -4.3082383 |
| H | -0.2570755 | 9.8070462  | 4.6060234  |
| H | 0.1676960  | -3.6977014 | -4.2954428 |
| H | -0.2601019 | 3.5576846  | 4.5958797  |

### **XEBHER**

|    |            |            |            |
|----|------------|------------|------------|
| N  | -1.6236663 | 0.2122504  | 4.1199989  |
| C  | -3.5686657 | 0.2322504  | 6.1369984  |
| C  | -3.1046659 | -0.9637493 | 5.5959985  |
| H  | -3.4794537 | -1.9306666 | 5.9364276  |
| C  | -2.1436661 | -0.9217493 | 4.5869988  |
| H  | -1.7758365 | -1.8536706 | 4.1484451  |
| C  | -2.0686662 | 1.3702501  | 4.6439988  |
| H  | -1.6384694 | 2.2975045  | 4.2447314  |
| C  | -3.0366659 | 1.4092501  | 5.6449985  |
| H  | -3.3524910 | 2.3844904  | 6.0202778  |
| Ag | -0.1196667 | 0.1512504  | 2.5809994  |
| Ag | 0.1193332  | -0.1507495 | -2.5809992 |

|   |            |            |            |
|---|------------|------------|------------|
| N | -1.3316664 | -0.1647495 | -0.9969996 |
| C | -3.2686658 | -0.0537495 | 1.0429998  |
| C | -2.7376660 | -1.2757492 | 0.6119999  |
| H | -3.0615238 | -2.2301635 | 1.0309636  |
| C | -1.7776662 | -1.2827492 | -0.4009998 |
| H | -1.3630913 | -2.2336770 | -0.7593464 |
| C | -1.8456662 | 1.0032502  | -0.5829997 |
| H | -1.4631940 | 1.9165090  | -1.0449015 |
| C | -2.7866660 | 1.1012502  | 0.4400000  |
| H | -3.1101602 | 2.0957763  | 0.7523858  |
| N | 1.6233328  | -0.2127495 | -4.1199988 |
| N | 1.3323329  | 0.1642504  | 0.9969998  |
| C | 3.2693323  | 0.0542505  | -1.0429996 |
| C | 2.7373325  | 1.2762501  | -0.6119997 |
| H | 3.0611934  | 2.2306652  | -1.0310044 |
| C | 1.7783328  | 1.2832501  | 0.4010000  |
| H | 1.3635075  | 2.2338920  | 0.7597944  |
| C | 1.8463327  | -1.0027493 | 0.5829999  |
| H | 1.4639578  | -1.9160405 | 1.0450447  |
| C | 2.7863325  | -1.1017492 | -0.4399998 |
| H | 3.1096957  | -2.0962727 | -0.7524502 |
| C | 3.5683323  | -0.2317495 | -6.1369982 |
| C | 3.1043324  | 0.9642502  | -5.5959983 |
| H | 3.4788834  | 1.9313295  | -5.9361609 |
| C | 2.1433327  | 0.9212502  | -4.5869986 |
| H | 1.7753093  | 1.8529975  | -4.1481878 |
| C | 2.0683327  | -1.3707491 | -4.6439986 |
| H | 1.6381264  | -2.2979927 | -4.2447236 |
| C | 3.0363324  | -1.4097491 | -5.6449983 |
| H | 3.3524666  | -2.3847602 | -6.0205581 |
| P | 0.2043332  | -4.5827482 | -2.3919992 |
| F | -0.4586666 | -5.7207479 | -3.2729990 |
| F | 0.8493330  | -5.7487479 | -1.5659995 |
| F | 1.4683328  | -4.5727482 | -3.3569990 |
| F | -1.0596664 | -4.6157482 | -1.4249995 |
| F | -0.4506666 | -3.4207486 | -3.2279990 |
| F | 0.8103330  | -3.4467486 | -1.5369995 |
| P | -0.2046667 | 4.5832492  | 2.3919994  |
| F | 0.4583331  | 5.7202489  | 3.2729992  |
| F | -0.8496665 | 5.7482489  | 1.5659996  |
| F | -1.4686663 | 4.5722492  | 3.3569991  |
| F | 1.0603330  | 4.6152492  | 1.4249997  |
| F | 0.4503331  | 3.4212495  | 3.2279992  |
| F | -0.8106665 | 3.4472495  | 1.5369997  |

|   |            |            |            |
|---|------------|------------|------------|
| H | -4.0167389 | -0.0069073 | 1.8376005  |
| H | -4.3245644 | 0.2379476  | 6.9256447  |
| H | 4.3242327  | -0.2375008 | -6.9256548 |
| H | 4.0174540  | 0.0075422  | -1.8375375 |

## ZEDFOG

|    |            |            |            |
|----|------------|------------|------------|
| Ag | 1.2281467  | -0.3326495 | -0.1013286 |
| N  | 0.6897835  | -2.4336621 | 0.1443402  |
| C  | -0.6168523 | -4.2976473 | -0.6143284 |
| H  | -1.4017191 | -4.6547359 | -1.2824770 |
| N  | 1.6381465  | 1.7933493  | -0.2083286 |
| C  | -0.2728525 | -2.9556480 | -0.6293284 |
| H  | -0.7768901 | -2.2566363 | -1.3083521 |
| C  | 1.8121464  | 4.5683478  | 0.0846712  |
| H  | 1.8823705  | 5.6527911  | 0.2013683  |
| C  | 0.0631473  | -5.1236468 | 0.2366712  |
| H  | -0.1565495 | -6.1941560 | 0.2721049  |
| C  | 1.3101467  | -3.2376478 | 1.0176708  |
| C  | 2.8121459  | 3.7453482  | 0.5616710  |
| H  | 3.6939159  | 4.1555866  | 1.0582442  |
| C  | 0.6801471  | 2.6233488  | -0.6563284 |
| H  | -0.1691559 | 2.1487443  | -1.1634064 |
| C  | 0.7241470  | 3.9893480  | -0.5393284 |
| H  | -0.0980281 | 4.5804009  | -0.9457577 |
| C  | 2.7091459  | 2.3793490  | 0.3936710  |
| C  | 1.0271469  | -4.5906471 | 1.0786708  |
| H  | 1.5696832  | -5.2232214 | 1.7840640  |
| C  | -1.0188521 | 1.8373492  | 2.0156702  |
| C  | 0.1921473  | -0.0116497 | 3.0396696  |
| H  | 1.0182378  | -0.3552905 | 3.6713643  |
| C  | 0.0921473  | 1.3293496  | 2.7676698  |
| C  | -1.7888516 | 0.8773498  | 1.3716706  |
| H  | -2.5243825 | 1.1863153  | 0.6219599  |
| C  | -0.7788521 | -0.9206492 | 2.6456698  |
| C  | -1.7058517 | -0.4816494 | 1.6876704  |
| S  | -1.6958517 | 0.2143502  | -2.6333272 |
| F  | -3.0388509 | 0.4393500  | -4.8783260 |
| F  | -0.9528521 | 1.0283498  | -5.0123258 |
| F  | -1.5108517 | -1.0596491 | -4.9073260 |
| O  | -2.1048514 | 1.5793494  | -2.3273274 |
| O  | -0.2988525 | -0.0806496 | -2.3663274 |
| C  | -1.7448516 | 0.1723502  | -4.3923262 |
| O  | -2.5948511 | -0.8126492 | -2.2373274 |

|   |            |            |           |
|---|------------|------------|-----------|
| H | 2.0660285  | -2.7844183 | 1.6637980 |
| H | -2.3902293 | -1.1800353 | 1.2003185 |
| H | 0.8334529  | 2.0240609  | 3.1719737 |
| H | -0.7290418 | -1.9698569 | 2.9438628 |
| H | -1.1397071 | 2.9039659  | 1.8232497 |
| H | 3.4904201  | 1.7071602  | 0.7564390 |
